# Supplementary material for: Age-related penetrance of the C9orf72 repeat expansion
Source: PubMed Central journal article supplement (PMC5437033; doi:10.1038/s41598-017-02364-1), 2017-05-18
Supplement: 41598_2017_2364_MOESM1_ESM.pdf [file 41598_2017_2364_MOESM1_ESM.pdf]

## Supplementary Information

Age-related penetrance of the *C9orf72* repeat expansion

Natalie A. Murphy, Karissa C. Arthur, Pentti J. Tienari, Henry Houlden, Adriano Chiò & Bryan J.

Traynor

**Supplementary Table S1. Geographical origin of *C9orf72* repeat expansion carriers.**

| <b>Area of Origin</b> | <b>Number of cases</b> | <b>Number of controls</b> |
|-----------------------|------------------------|---------------------------|
| Australia             | 45                     | 1                         |
| Belgium               | 21                     | 0                         |
| China                 | 5                      | 0                         |
| Denmark               | 3                      | 0                         |
| Europe                | 2                      | 0                         |
| Finland               | 149                    | 2                         |
| France                | 76                     | 1                         |
| Germany               | 41                     | 2                         |
| Greece                | 16                     | 0                         |
| Iran                  | 5                      | 0                         |
| Ireland               | 39                     | 0                         |
| Israel                | 3                      | 0                         |
| Italy                 | 208                    | 2                         |
| Japan                 | 9                      | 0                         |
| Netherlands           | 35                     | 0                         |
| Portugal              | 3                      | 0                         |
| Russia                | 9                      | 0                         |
| Sardinia              | 22                     | 0                         |
| Serbia                | 4                      | 0                         |
| Singapore             | 1                      | 0                         |
| Slovenia              | 5                      | 0                         |
| Spain                 | 5                      | 0                         |
| Sweden                | 1                      | 0                         |
| Taiwan                | 8                      | 0                         |
| Turkey                | 29                     | 0                         |
| United Kingdom        | 255                    | 9                         |
| United States         | 149                    | 6                         |

**Supplementary Table S2. Full data breakdown for *C9orf72* repeat expansion carriers.** Table displaying the sample ID, gender, age of onset, diagnosis, site of onset, familial status, and geographical origin for the 1,170 individuals with the *C9orf72* repeat expansion included in the analysis.

| Sample ID    | Gender | Age of onset | Diagnosis | Site of onset | Familial status | Geographical origin | Reference |
|--------------|--------|--------------|-----------|---------------|-----------------|---------------------|-----------|
| Abramycheva1 | M      | 42           | ALS       | Spinal        | Sporadic        | Russia              | 1         |
| Abramycheva2 | M      | 53           | ALS       | Bulbar        | Sporadic        | Russia              | 1         |
| Abramycheva3 | M      | 63           | ALS       | Spinal        | Sporadic        | Russia              | 1         |
| Abramycheva4 | F      | 30           | ALS       | Bulbar        | Sporadic        | Russia              | 1         |
| Abramycheva5 | F      | 65           | ALS       | Spinal        | Sporadic        | Russia              | 1         |
| Abramycheva6 | F      | 65           | ALS       | Spinal        | Familial        | Russia              | 1         |
| Abramycheva7 | M      | 65           | ALS       | Spinal        | Familial        | Russia              | 1         |
| Abramycheva8 | M      | 45           | ALS       | Spinal        | Familial        | Russia              | 1         |
| Abramycheva9 | M      | 58           | ALS       | Bulbar        | Sporadic        | Russia              | 1         |
| Al-Sarraaj1  | F      | 55           | FTD       | NA            | Sporadic        | UK                  | 2         |
| Al-Sarraaj2  | F      | 66           | ALS       | NA            | Sporadic        | UK                  | 2         |
| Al-Sarraaj3  | M      | 51           | ALS       | Bulbar        | Familial        | UK                  | 2         |
| Al-Sarraaj4  | M      | 50           | ALS       | Spinal        | Sporadic        | UK                  | 2         |
| Al-Sarraaj5  | M      | 69           | ALS       | Spinal        | Sporadic        | UK                  | 2         |
| Al-Sarraaj6  | F      | 65           | FTD       | NA            | Sporadic        | UK                  | 2         |
| Al-Sarraaj7  | F      | 35           | ALS       | Spinal        | Sporadic        | UK                  | 2         |
| Al-Sarraaj8  | M      | 51           | FTD       | NA            | Sporadic        | UK                  | 2         |
| Al-Sarraaj9  | M      | 61           | ALS       | Spinal        | Sporadic        | UK                  | 2         |
| Al-Sarraaj10 | F      | 42           | ALS-FTD   | Bulbar        | Sporadic        | UK                  | 2         |
| Al-Sarraaj11 | M      | 52           | ALS       | Spinal        | Familial        | UK                  | 2         |
| Al-Sarraaj12 | M      | 57           | ALS       | Spinal        | Familial        | UK                  | 2         |
| Al-Sarraaj13 | M      | 68           | FTD       | NA            | Sporadic        | UK                  | 2         |
| Al-Sarraaj14 | M      | 55           | ALS       | NA            | Sporadic        | UK                  | 2         |
| Alavi1       | M      | 36           | ALS       | Spinal        | Familial        | Iran                | 3         |
| Alavi2       | F      | 34           | ALS       | Spinal        | Sporadic        | Iran                | 3         |
| Alavi3       | F      | 54           | ALS       | Spinal        | Familial        | Iran                | 3         |
| Alavi4       | M      | 57           | ALS       | Spinal        | Familial        | Iran                | 3         |
| Alavi5       | M      | 35           | ALS       | Spinal        | Familial        | Iran                | 3         |
| Beck1        | NA     | 54           | Control   | NA            | NA              | UK                  | 4         |
| Beck2        | NA     | 54           | Control   | NA            | NA              | UK                  | 4         |
| Beck3        | NA     | 54           | Control   | NA            | NA              | UK                  | 4         |
| Beck4        | NA     | 54           | Control   | NA            | NA              | UK                  | 4         |
| Beck5        | NA     | 54           | Control   | NA            | NA              | UK                  | 4         |
| Beck6        | NA     | 54           | Control   | NA            | NA              | UK                  | 4         |
| Beck7        | NA     | 54           | Control   | NA            | NA              | UK                  | 4         |
| Beck8        | NA     | 54           | Control   | NA            | NA              | UK                  | 4         |
| Beck9        | NA     | 54           | Control   | NA            | NA              | UK                  | 4         |
| Benussi1     | F      | 58           | FTD       | NA            | Familial        | Italy               | 5         |
| Benussi2     | M      | 41           | AD        | NA            | Familial        | Italy               | 5         |
| Benussi3     | F      | 59           | FTD       | NA            | Familial        | Italy               | 5         |
| Benussi4     | F      | 46           | FTD       | NA            | Familial        | Italy               | 5         |

|               |   |    |         |        |          |          |   |
|---------------|---|----|---------|--------|----------|----------|---|
| Benussi5      | M | 62 | FTD     | NA     | Familial | Italy    | 5 |
| Benussi6      | F | 58 | FTD     | NA     | Familial | Italy    | 5 |
| Benussi7      | F | 49 | FTD     | NA     | Familial | Italy    | 5 |
| Benussi8      | M | 47 | FTD     | NA     | Familial | Italy    | 5 |
| Benussi9      | M | 56 | FTD     | NA     | Familial | Italy    | 5 |
| Benussi10     | M | 61 | FTD     | NA     | Familial | Italy    | 5 |
| Benussi11     | M | 55 | FTD     | NA     | Familial | Italy    | 5 |
| Benussi12     | M | 52 | FTD     | NA     | Familial | Italy    | 5 |
| Benussi13     | M | 58 | FTD     | NA     | Familial | Italy    | 5 |
| Benussi14     | F | 57 | FTD     | NA     | Familial | Italy    | 5 |
| Benussi15     | M | 80 | FTD     | NA     | Familial | Italy    | 5 |
| Benussi16     | F | 47 | FTD     | NA     | Sporadic | Italy    | 5 |
| Benussi17     | F | 70 | FTD     | NA     | Sporadic | Italy    | 5 |
| Benussi18     | M | 72 | FTD-ALS | NA     | Sporadic | Italy    | 5 |
| Benussi19     | M | 56 | FTD     | NA     | Sporadic | Italy    | 5 |
| Benussi20     | F | 57 | FTD     | NA     | Sporadic | Italy    | 5 |
| Benussi21     | M | 57 | FTD-ALS | NA     | Sporadic | Italy    | 5 |
| Benussi22     | F | 51 | FTD     | NA     | Sporadic | Italy    | 5 |
| Benussi23     | F | 45 | FTD     | NA     | Sporadic | Italy    | 5 |
| Benussi24     | M | 49 | FTD-ALS | NA     | Sporadic | Italy    | 5 |
| Benussi25     | M | 59 | FTD     | NA     | Sporadic | Italy    | 5 |
| Benussi26     | F | 62 | FTD     | NA     | Sporadic | Italy    | 5 |
| Benussi27     | M | 58 | FTD     | NA     | Sporadic | Italy    | 5 |
| Benussi28     | M | 56 | FTD-ALS | NA     | Sporadic | Italy    | 5 |
| Benussi29     | F | 47 | ALS     | NA     | Sporadic | Italy    | 5 |
| Cerami1       | M | 54 | FTD     | NA     | NA       | Italy    | 6 |
| Cerami2       | F | 68 | FTD     | NA     | NA       | Italy    | 6 |
| Cerami3       | F | 68 | FTD     | NA     | NA       | Italy    | 6 |
| Cerami4       | M | 61 | FTD     | NA     | NA       | Italy    | 6 |
| Chester1      | F | 40 | ALS     | Bulbar | Familial | Portugal | 7 |
| Chester2      | M | 40 | ALS     | Bulbar | Familial | Portugal | 7 |
| Chester3      | F | 47 | ALS     | Bulbar | Familial | Portugal | 7 |
| Chio1         | F | 64 | ALS     | Spinal | Familial | Italy    | 8 |
| Chio2         | M | 33 | ALS     | Spinal | Familial | Italy    | 8 |
| Chio3         | M | 63 | ALS     | Spinal | Familial | Italy    | 8 |
| Chio4         | F | 62 | ALS     | Spinal | Familial | Italy    | 8 |
| Chio5         | F | 62 | ALS     | Bulbar | Familial | Italy    | 8 |
| Chio6         | F | 36 | ALS-FTD | Spinal | Familial | Italy    | 8 |
| Chio7         | M | 45 | ALS     | Spinal | Familial | Italy    | 8 |
| Chio8         | M | 59 | ALS     | Spinal | Familial | Italy    | 8 |
| Chio9         | F | 78 | FTD     | NA     | Familial | Italy    | 8 |
| Chio10        | M | 59 | FTD     | NA     | Familial | Italy    | 8 |
| Chio11        | F | 59 | ALS-FTD | Bulbar | Familial | Italy    | 8 |
| Chio12        | M | 62 | FTD     | NA     | Familial | Italy    | 8 |
| Cooper-Knock1 | M | 69 | ALS     | Spinal | Familial | UK       | 9 |
| Cooper-Knock2 | F | 59 | ALS     | Spinal | Familial | UK       | 9 |
| Cooper-Knock3 | M | 42 | ALS     | Spinal | Familial | UK       | 9 |

|                |   |    |     |           |          |    |   |
|----------------|---|----|-----|-----------|----------|----|---|
| Cooper-Knock4  | M | 66 | ALS | Bulbar    | Familial | UK | 9 |
| Cooper-Knock5  | M | 64 | ALS | Spinal    | Familial | UK | 9 |
| Cooper-Knock6  | F | 62 | ALS | Bulbar    | Familial | UK | 9 |
| Cooper-Knock7  | F | 56 | ALS | Spinal    | Familial | UK | 9 |
| Cooper-Knock8  | F | 50 | ALS | Bulbar    | Familial | UK | 9 |
| Cooper-Knock9  | M | 47 | ALS | General   | Familial | UK | 9 |
| Cooper-Knock10 | F | 63 | ALS | Cognitive | Familial | UK | 9 |
| Cooper-Knock11 | F | 61 | ALS | Spinal    | Familial | UK | 9 |
| Cooper-Knock12 | F | 65 | ALS | Bulbar    | Sporadic | UK | 9 |
| Cooper-Knock13 | F | 67 | NA  | Spinal    | Sporadic | UK | 9 |
| Cooper-Knock14 | M | 63 | ALS | Spinal    | Sporadic | UK | 9 |
| Cooper-Knock15 | M | 56 | ALS | Bulbar    | Sporadic | UK | 9 |
| Cooper-Knock16 | F | 61 | ALS | Bulbar    | Sporadic | UK | 9 |
| Cooper-Knock17 | F | 58 | ALS | Spinal    | Sporadic | UK | 9 |
| Cooper-Knock18 | F | 61 | ALS | Spinal    | Sporadic | UK | 9 |
| Cooper-Knock19 | M | 62 | ALS | Bulbar    | Sporadic | UK | 9 |
| Cooper-Knock20 | M | 45 | ALS | Spinal    | Sporadic | UK | 9 |
| Cooper-Knock21 | F | 51 | ALS | General   | Sporadic | UK | 9 |
| Cooper-Knock22 | F | 47 | ALS | Spinal    | Familial | UK | 9 |
| Cooper-Knock23 | M | 61 | ALS | Spinal    | Familial | UK | 9 |
| Cooper-Knock24 | F | 27 | ALS | Bulbar    | Familial | UK | 9 |
| Cooper-Knock25 | F | 50 | ALS | Bulbar    | Familial | UK | 9 |
| Cooper-Knock26 | F | 48 | ALS | Spinal    | Familial | UK | 9 |
| Cooper-Knock27 | M | 48 | ALS | Bulbar    | Familial | UK | 9 |
| Cooper-Knock28 | F | 61 | ALS | Spinal    | Familial | UK | 9 |
| Cooper-Knock29 | F | 44 | ALS | Bulbar    | Familial | UK | 9 |
| Cooper-Knock30 | F | 61 | NA  | Bulbar    | Familial | UK | 9 |
| Cooper-Knock31 | F | 64 | ALS | Spinal    | Familial | UK | 9 |
| Cooper-Knock32 | F | 45 | ALS | Bulbar    | Familial | UK | 9 |
| Cooper-Knock33 | M | 51 | ALS | Spinal    | Familial | UK | 9 |
| Cooper-Knock34 | M | 65 | ALS | Spinal    | Familial | UK | 9 |
| Cooper-Knock35 | M | 63 | ALS | General   | Familial | UK | 9 |
| Cooper-Knock36 | F | 37 | ALS | Spinal    | Familial | UK | 9 |
| Cooper-Knock37 | M | 56 | ALS | Spinal    | Sporadic | UK | 9 |
| Cooper-Knock38 | M | 56 | ALS | Spinal    | Sporadic | UK | 9 |
| Cooper-Knock39 | F | 66 | ALS | Bulbar    | Sporadic | UK | 9 |
| Cooper-Knock40 | M | 60 | ALS | Bulbar    | Sporadic | UK | 9 |
| Cooper-Knock41 | F | 50 | ALS | Spinal    | Sporadic | UK | 9 |
| Cooper-Knock42 | M | 60 | ALS | Spinal    | Sporadic | UK | 9 |
| Cooper-Knock43 | M | 43 | ALS | Spinal    | Sporadic | UK | 9 |
| Cooper-Knock44 | M | 64 | ALS | Spinal    | Sporadic | UK | 9 |
| Cooper-Knock45 | M | 74 | ALS | Spinal    | Sporadic | UK | 9 |
| Cooper-Knock46 | M | 58 | ALS | Spinal    | Sporadic | UK | 9 |
| Cooper-Knock47 | F | 57 | ALS | Spinal    | Sporadic | UK | 9 |
| Cooper-Knock48 | F | 62 | ALS | Spinal    | Sporadic | UK | 9 |
| Cooper-Knock49 | F | 57 | ALS | General   | Sporadic | UK | 9 |
| Cooper-Knock50 | M | 60 | ALS | Bulbar    | Sporadic | UK | 9 |

|                |   |    |         |           |          |           |    |
|----------------|---|----|---------|-----------|----------|-----------|----|
| Cooper-Knock51 | M | 63 | ALS     | Spinal    | Sporadic | UK        | 9  |
| Cooper-Knock52 | M | 61 | ALS     | Spinal    | Sporadic | UK        | 9  |
| Cooper-Knock53 | M | 51 | ALS     | Bulbar    | Sporadic | UK        | 9  |
| Cooper-Knock54 | M | 50 | ALS     | Bulbar    | Sporadic | UK        | 9  |
| Cooper-Knock55 | F | 59 | ALS     | Spinal    | Sporadic | UK        | 9  |
| Cooper-Knock56 | F | 71 | ALS     | Spinal    | Sporadic | UK        | 9  |
| Cooper-Knock57 | F | 65 | ALS     | Spinal    | Sporadic | UK        | 9  |
| Cooper-Knock58 | F | 52 | ALS     | Spinal    | Sporadic | UK        | 9  |
| Cooper-Knock59 | F | 63 | ALS     | Bulbar    | Sporadic | UK        | 9  |
| Cooper-Knock60 | F | 71 | ALS     | Spinal    | Sporadic | UK        | 9  |
| Cooper-Knock61 | M | 65 | ALS     | Spinal    | Sporadic | UK        | 9  |
| Dobson-Stone1  | F | 53 | FTD     | Cognitive | NA       | Australia | 10 |
| Dobson-Stone2  | M | 60 | FTD-ALS | NA        | NA       | Australia | 10 |
| Dobson-Stone3  | F | 62 | FTD     | Cognitive | NA       | Australia | 10 |
| Dobson-Stone4  | M | 45 | FTD     | Cognitive | NA       | Australia | 10 |
| Dobson-Stone5  | M | 49 | FTD     | Cognitive | NA       | Australia | 10 |
| Dobson-Stone6  | M | 65 | FTD-ALS | NA        | NA       | Australia | 10 |
| Dobson-Stone7  | M | 48 | FTD     | Cognitive | NA       | Australia | 10 |
| Dobson-Stone8  | F | 61 | FTD     | Cognitive | NA       | Australia | 10 |
| Dobson-Stone9  | F | 47 | FTD-ALS | NA        | NA       | Australia | 10 |
| Dobson-Stone10 | M | 69 | AD      | NA        | NA       | Australia | 10 |
| Dobson-Stone11 | M | 63 | FTD     | Cognitive | NA       | Australia | 10 |
| Dobson-Stone12 | M | 55 | FTD     | Cognitive | NA       | Australia | 10 |
| Dobson-Stone13 | M | 60 | AD      | NA        | NA       | Australia | 10 |
| Dobson-Stone14 | M | 64 | FTD     | Cognitive | NA       | Australia | 10 |
| Dobson-Stone15 | F | 60 | FTD-ALS | NA        | NA       | Australia | 10 |
| Dobson-Stone16 | M | 56 | FTD     | Cognitive | NA       | Australia | 10 |
| Dobson-Stone17 | M | 60 | AD      | NA        | NA       | Australia | 10 |
| Dobson-Stone18 | F | 89 | Control | NA        | NA       | Australia | 10 |
| Dobson-Stone19 | M | 52 | ALS-FTD | NA        | Familial | Australia | 11 |
| Dobson-Stone20 | M | 43 | FTD     | Cognitive | Familial | Australia | 11 |
| Dobson-Stone21 | M | 57 | FTD-ALS | Cognitive | Familial | Australia | 11 |
| Dobson-Stone22 | M | 59 | FTD-ALS | Cognitive | Familial | Australia | 11 |
| Dobson-Stone23 | F | 52 | FTD-ALS | NA        | Familial | Australia | 11 |
| Dobson-Stone24 | M | 65 | FTD-ALS | NA        | Familial | Australia | 11 |
| Dobson-Stone25 | M | 41 | AD      | NA        | Sporadic | Australia | 11 |
| Dobson-Stone26 | M | 55 | FTD     | NA        | Familial | Australia | 11 |
| Dobson-Stone27 | F | 62 | ALS-FTD | NA        | Familial | Australia | 11 |
| Dobson-Stone28 | F | 64 | FTD     | NA        | Familial | Australia | 11 |
| Dobson-Stone29 | M | 58 | ALS-FTD | NA        | Familial | Australia | 11 |
| Dobson-Stone30 | F | 41 | ALS-FTD | NA        | Familial | Australia | 11 |
| Dobson-Stone31 | F | 56 | FTD     | Cognitive | Familial | Spain     | 11 |
| Dobson-Stone32 | M | 64 | FTD     | Cognitive | Sporadic | Spain     | 11 |
| Dobson-Stone33 | F | 63 | FTD     | Cognitive | Familial | Spain     | 11 |
| Dobson-Stone34 | F | 70 | FTD     | NA        | Sporadic | Spain     | 11 |
| Dobson-Stone35 | M | 51 | FTD     | Cognitive | Familial | Spain     | 11 |
| Dombroski1     | M | 53 | ALS     | NA        | Sporadic | US        | 12 |

|              |    |    |         |           |          |       |    |
|--------------|----|----|---------|-----------|----------|-------|----|
| Ferrari1     | M  | 53 | FTD     | Cognitive | Familial | US    | 13 |
| Ferrari2     | M  | 60 | ALS-FTD | Spinal    | Sporadic | US    | 13 |
| Ferrari3     | M  | 61 | ALS-FTD | Bulbar    | Familial | US    | 13 |
| Ferrari4     | M  | 59 | FTD     | Cognitive | Familial | US    | 13 |
| ND07551      | M  | 66 | Control | NA        | NA       | US    | 13 |
| Fratta1      | NA | 57 | ALS     | Bulbar    | Sporadic | UK    | 14 |
| Galimberti1  | M  | 81 | Control | NA        | NA       | Italy | 15 |
| Galimberti2  | F  | 80 | Control | NA        | NA       | Italy | 15 |
| Galimberti3  | F  | 57 | FTD     | Cognitive | Familial | Italy | 16 |
| Galimberti4  | F  | 75 | FTD     | Cognitive | Sporadic | Italy | 16 |
| Galimberti5  | M  | 52 | FTD     | Cognitive | Familial | Italy | 16 |
| Galimberti6  | F  | 70 | FTD     | Cognitive | Sporadic | Italy | 16 |
| Galimberti7  | F  | 74 | FTD     | Cognitive | Sporadic | Italy | 16 |
| Galimberti8  | M  | 57 | FTD-ALS | Cognitive | Familial | Italy | 16 |
| Galimberti9  | F  | 68 | FTD     | NA        | Sporadic | Italy | 16 |
| Galimberti10 | F  | 72 | FTD     | Cognitive | Familial | Italy | 16 |
| Galimberti11 | M  | 59 | FTD     | Cognitive | Sporadic | Italy | 16 |
| Galimberti12 | M  | 49 | FTD     | Cognitive | Familial | Italy | 16 |
| Galimberti13 | F  | 73 | FTD-ALS | Cognitive | Familial | Italy | 16 |
| Galimberti14 | F  | 77 | FTD     | Cognitive | Sporadic | Italy | 16 |
| Galimberti15 | M  | 58 | FTD     | Cognitive | Familial | Italy | 16 |
| Galimberti16 | F  | 66 | FTD     | Cognitive | Familial | Italy | 16 |
| Galimberti17 | F  | 60 | FTD     | Cognitive | Familial | Italy | 16 |
| Galimberti18 | M  | 62 | FTD     | NA        | Sporadic | Italy | 16 |
| Galimberti19 | F  | 71 | FTD     | Cognitive | Familial | Italy | 16 |
| Galimberti20 | M  | 65 | FTD     | Cognitive | Familial | Italy | 16 |
| Galimberti21 | M  | 66 | FTD-ALS | Cognitive | Sporadic | Italy | 16 |
| Galimberti22 | F  | 60 | FTD     | Cognitive | Sporadic | Italy | 16 |
| Galimberti23 | M  | 48 | FTD-ALS | Cognitive | Familial | Italy | 16 |
| Galimberti24 | F  | 49 | FTD     | Cognitive | Sporadic | Italy | 16 |
| Galimberti25 | F  | 65 | FTD     | Cognitive | Sporadic | Italy | 16 |
| Galimberti26 | M  | NA | FTD     | Cognitive | Sporadic | Italy | 16 |
| Galimberti27 | F  | 50 | FTD     | Cognitive | Familial | Italy | 16 |
| Galimberti28 | F  | 55 | FTD     | Cognitive | Familial | Italy | 16 |
| Galimberti29 | M  | 70 | FTD     | Cognitive | Familial | Italy | 16 |
| Galimberti30 | F  | 74 | FTD     | Cognitive | Familial | Italy | 16 |
| Galimberti31 | F  | 60 | FTD     | Cognitive | Familial | Italy | 16 |
| Galimberti32 | M  | 71 | FTD     | Cognitive | Familial | Italy | 16 |
| Galimberti33 | M  | 52 | FTD-ALS | Cognitive | Familial | Italy | 16 |
| Galimberti34 | F  | 71 | FTD     | Cognitive | Familial | Italy | 16 |
| Galimberti35 | F  | 65 | FTD-ALS | Cognitive | Familial | Italy | 16 |
| Galimberti36 | M  | 71 | FTD-ALS | Cognitive | Sporadic | Italy | 16 |
| Galimberti37 | M  | 64 | FTD     | Cognitive | Familial | Italy | 16 |
| Galimberti38 | F  | 76 | FTD     | Cognitive | Sporadic | Italy | 16 |
| Galimberti39 | M  | 66 | FTD     | Cognitive | Familial | Italy | 16 |
| Galimberti40 | F  | 57 | FTD     | Cognitive | Familial | Italy | 16 |
| Galimberti41 | F  | 62 | FTD-ALS | Cognitive | Sporadic | Italy | 16 |

|               |    |    |         |           |          |         |    |
|---------------|----|----|---------|-----------|----------|---------|----|
| Gijsselinck1  | M  | 57 | FTD     | Cognitive | Familial | Belgium | 17 |
| Gijsselinck2  | F  | 51 | FTD     | Cognitive | Familial | Belgium | 17 |
| Gijsselinck3  | M  | 53 | FTD     | Cognitive | Familial | Belgium | 17 |
| Gijsselinck4  | F  | 42 | FTD     | Cognitive | Sporadic | Belgium | 17 |
| Gijsselinck5  | M  | 69 | FTD     | Cognitive | Familial | Belgium | 17 |
| Gijsselinck6  | F  | 45 | FTD     | Cognitive | Familial | Belgium | 17 |
| Gijsselinck7  | M  | 46 | FTD     | Cognitive | Familial | Belgium | 17 |
| Gijsselinck8  | M  | 53 | FTD     | Cognitive | Familial | Belgium | 17 |
| Gijsselinck9  | M  | 58 | FTD     | Cognitive | Sporadic | Belgium | 17 |
| Gijsselinck10 | M  | 49 | FTD     | Cognitive | Sporadic | Belgium | 17 |
| Gijsselinck11 | F  | 65 | ALS-FTD | Bulbar    | Familial | Belgium | 17 |
| Gijsselinck12 | F  | 60 | ALS-FTD | Bulbar    | Familial | Belgium | 17 |
| Gijsselinck13 | F  | 69 | ALS-FTD | Spinal    | Familial | Belgium | 17 |
| Gijsselinck14 | F  | 65 | ALS-FTD | Bulbar    | Familial | Belgium | 17 |
| Gijsselinck15 | M  | 50 | ALS-FTD | Bulbar    | Familial | Belgium | 17 |
| Gijsselinck16 | M  | 60 | ALS     | Bulbar    | Familial | Belgium | 17 |
| Gijsselinck17 | F  | 47 | ALS     | Spinal    | Familial | Belgium | 17 |
| Gijsselinck18 | M  | 55 | ALS     | Spinal    | Familial | Belgium | 17 |
| Gijsselinck19 | F  | 62 | ALS     | Spinal    | Sporadic | Belgium | 17 |
| Gijsselinck20 | M  | 38 | ALS     | Spinal    | Sporadic | Belgium | 17 |
| Gijsselinck21 | M  | 65 | ALS     | Spinal    | NA       | Belgium | 17 |
| Harms13       | NA | 73 | Control | NA        | NA       | US      | 18 |
| Harms1        | M  | 53 | ALS     | Spinal    | Sporadic | US      | 19 |
| Harms2        | M  | 46 | ALS     | Spinal    | Familial | US      | 19 |
| Harms3        | M  | 72 | ALS-FTD | Bulbar    | Familial | US      | 19 |
| Harms4        | F  | 52 | ALS     | Spinal    | Familial | US      | 19 |
| Harms5        | M  | 49 | ALS     | Bulbar    | Sporadic | US      | 19 |
| Harms6        | F  | 70 | ALS     | Spinal    | Sporadic | US      | 19 |
| Harms7        | M  | 68 | ALS     | Spinal    | Sporadic | US      | 19 |
| Harms8        | F  | 43 | ALS     | Spinal    | Sporadic | US      | 19 |
| Harms9        | F  | 62 | ALS-FTD | Spinal    | Familial | US      | 19 |
| Harms10       | NA | 50 | Control | NA        | NA       | US      | 20 |
| Harms11       | NA | 67 | Control | NA        | NA       | US      | 20 |
| Harms12       | NA | 71 | Control | NA        | NA       | US      | 20 |
| He1           | M  | 58 | ALS     | Spinal    | Sporadic | China   | 21 |
| He2           | NA | 58 | ALS     | Spinal    | Sporadic | China   | 21 |
| He3           | M  | 54 | ALS     | Bulbar    | Sporadic | China   | 21 |
| Ishiura1      | F  | 72 | ALS     | Bulbar    | Sporadic | Japan   | 22 |
| Ishiura2      | F  | 71 | ALS     | Spinal    | Familial | Japan   | 22 |
| Ishiura3      | F  | 41 | ALS     | Spinal    | Sporadic | Japan   | 22 |
| Jiao1         | M  | 47 | ALS-FTD | Spinal    | Familial | China   | 23 |
| Jiao2         | M  | 67 | FTD     | Cognitive | Sporadic | China   | 23 |
| Kaivorinne1   | F  | 58 | FTD     | NA        | Sporadic | Finland | 24 |
| Kaivorinne2   | M  | 57 | FTD     | NA        | Familial | Finland | 24 |
| Kaivorinne3   | F  | 64 | FTD     | NA        | Familial | Finland | 24 |
| Kaivorinne4   | F  | 60 | FTD     | NA        | Familial | Finland | 24 |
| Kaivorinne5   | M  | 54 | FTD     | NA        | Familial | Finland | 24 |



|              |   |    |         |           |          |           |    |
|--------------|---|----|---------|-----------|----------|-----------|----|
| Kaivorinne6  | F | 47 | FTD     | NA        | Familial | Finland   | 24 |
| Kaivorinne7  | F | 51 | FTD     | NA        | Sporadic | Finland   | 24 |
| Kaivorinne8  | M | 55 | FTD     | NA        | Familial | Finland   | 24 |
| Kaivorinne9  | M | 54 | FTD     | NA        | Familial | Finland   | 24 |
| Kaivorinne10 | M | 46 | FTD     | NA        | Familial | Finland   | 24 |
| Kaivorinne11 | F | 59 | FTD     | NA        | Familial | Finland   | 24 |
| Kaivorinne12 | M | 64 | FTD     | NA        | Familial | Finland   | 24 |
| Kaivorinne13 | F | 60 | FTD     | NA        | Sporadic | Finland   | 24 |
| Kaivorinne14 | M | 51 | FTD     | NA        | Sporadic | Finland   | 24 |
| Kaivorinne15 | M | 64 | FTD     | NA        | Sporadic | Finland   | 24 |
| Kaivorinne16 | F | 63 | FTD     | NA        | Familial | Finland   | 24 |
| Kaivorinne17 | F | 59 | ALS-FTD | Bulbar    | Sporadic | Finland   | 24 |
| Kaivorinne18 | F | 54 | ALS-FTD | Bulbar    | Familial | Finland   | 24 |
| Kaivorinne19 | M | 70 | ALS-FTD | Bulbar    | Sporadic | Finland   | 24 |
| Kaivorinne20 | M | 57 | ALS-FTD | Bulbar    | Sporadic | Finland   | 24 |
| Kaivorinne21 | F | 60 | ALS-FTD | Spinal    | Sporadic | Finland   | 24 |
| Kaivorinne22 | F | 66 | ALS-FTD | Bulbar    | Sporadic | Finland   | 24 |
| Kandiah1     | F | 42 | FTD     | Cognitive | Familial | Singapore | 25 |
| Kenna1       | M | 35 | ALS     | Spinal    | Familial | Ireland   | 26 |
| Kenna2       | M | 34 | ALS     | General   | Sporadic | Ireland   | 26 |
| Kenna3       | F | 51 | ALS     | Spinal    | Sporadic | Ireland   | 26 |
| Kenna4       | F | 60 | ALS     | Bulbar    | Sporadic | Ireland   | 26 |
| Kenna5       | M | 47 | ALS     | Bulbar    | Sporadic | Ireland   | 26 |
| Kenna6       | M | 66 | ALS     | Spinal    | Sporadic | Ireland   | 26 |
| Kenna7       | M | 44 | ALS     | Spinal    | Sporadic | Ireland   | 26 |
| Kenna8       | F | 43 | ALS     | Bulbar    | Sporadic | Ireland   | 26 |
| Kenna9       | F | 52 | ALS     | Bulbar    | Sporadic | Ireland   | 26 |
| Kenna10      | M | 68 | ALS     | Spinal    | Sporadic | Ireland   | 26 |
| Kenna11      | F | 82 | ALS     | Bulbar    | Familial | Ireland   | 26 |
| Kenna12      | F | 42 | ALS     | Spinal    | Sporadic | Ireland   | 26 |
| Kenna13      | F | 55 | ALS     | Spinal    | Sporadic | Ireland   | 26 |
| Kenna14      | F | 44 | ALS     | General   | Familial | Ireland   | 26 |
| Kenna15      | M | 55 | ALS     | Spinal    | Sporadic | Ireland   | 26 |
| Kenna16      | M | 62 | ALS-FTD | Spinal    | Sporadic | Ireland   | 26 |
| Kenna17      | M | 56 | ALS-FTD | Spinal    | Familial | Ireland   | 26 |
| Kenna18      | F | 44 | ALS     | Spinal    | Sporadic | Ireland   | 26 |
| Kenna19      | F | 65 | ALS-FTD | Spinal    | Familial | Ireland   | 26 |
| Kenna20      | M | 65 | ALS-FTD | Spinal    | Sporadic | Ireland   | 26 |
| Kenna21      | M | 48 | ALS     | Spinal    | Sporadic | Ireland   | 26 |
| Kenna22      | F | 63 | ALS     | Bulbar    | Sporadic | Ireland   | 26 |
| Kenna23      | F | 49 | ALS     | Spinal    | Sporadic | Ireland   | 26 |
| Kenna24      | F | 62 | ALS     | Spinal    | Sporadic | Ireland   | 26 |
| Kenna25      | M | 59 | ALS     | Bulbar    | Familial | Ireland   | 26 |
| Kenna26      | F | 64 | ALS     | Bulbar    | Familial | Ireland   | 26 |
| Kenna27      | F | 65 | ALS     | Bulbar    | Familial | Ireland   | 26 |
| Kenna28      | M | 66 | ALS     | Bulbar    | Familial | Ireland   | 26 |
| Kenna29      | M | 36 | ALS-FTD | Spinal    | Sporadic | Ireland   | 26 |

|            |   |    |         |           |          |           |    |
|------------|---|----|---------|-----------|----------|-----------|----|
| Kenna30    | M | 59 | ALS     | Bulbar    | Sporadic | Ireland   | 26 |
| Kenna31    | F | 72 | ALS     | Spinal    | Sporadic | Ireland   | 26 |
| Kenna32    | M | 44 | ALS     | Bulbar    | Sporadic | Ireland   | 26 |
| Kenna33    | M | 59 | ALS     | Spinal    | Familial | Ireland   | 26 |
| Kenna34    | F | 52 | ALS     | Spinal    | Familial | Ireland   | 26 |
| Kenna35    | M | 55 | ALS     | Spinal    | Sporadic | Ireland   | 26 |
| Kenna36    | M | 58 | ALS-FTD | Bulbar    | Familial | Ireland   | 26 |
| Kenna37    | M | 65 | ALS     | Spinal    | Familial | Ireland   | 26 |
| Kenna38    | M | 61 | ALS     | Spinal    | Sporadic | Ireland   | 26 |
| Konno1     | M | 61 | ALS     | Spinal    | Sporadic | Japan     | 27 |
| Konno2     | F | 63 | ALS     | Bulbar    | Sporadic | Japan     | 27 |
| LeBer1     | M | 55 | PD      | Spinal    | Familial | France    | 28 |
| LeBer2     | F | 48 | PD      | Spinal    | Sporadic | France    | 28 |
| LeBer3     | F | 30 | ALS     | Spinal    | Familial | France    | 28 |
| LeBer4     | M | 45 | FTD     | Cognitive | Sporadic | France    | 28 |
| Lindquist1 | M | 42 | CBS     | NA        | Familial | Denmark   | 29 |
| Lindquist2 | F | 53 | OPCD    | NA        | Familial | Denmark   | 29 |
| Lindquist3 | M | 62 | ALS-FTD | Bulbar    | Sporadic | Denmark   | 29 |
| Majounie1  | M | 65 | AD      | NA        | Familial | Europe    | 30 |
| Majounie2  | M | 71 | AD      | NA        | Familial | Europe    | 30 |
| AUS2337    | F | 55 | ALS     | Bulbar    | Sporadic | Australia | 31 |
| AUS1039    | F | 58 | ALS     | Spinal    | Sporadic | Australia | 31 |
| AUS2312    | F | 58 | ALS     | Spinal    | Sporadic | Australia | 31 |
| AUS2579    | F | 59 | ALS     | Bulbar    | Sporadic | Australia | 31 |
| AUS2423    | F | 60 | ALS     | Bulbar    | Sporadic | Australia | 31 |
| AUS1090    | F | 60 | ALS     | Spinal    | Sporadic | Australia | 31 |
| AUS2359    | F | 64 | ALS     | Bulbar    | Sporadic | Australia | 31 |
| AUS2516    | F | 67 | ALS     | Bulbar    | Sporadic | Australia | 31 |
| AUS2193    | F | 70 | ALS     | Bulbar    | Sporadic | Australia | 31 |
| AUS0318    | M | 50 | ALS     | Spinal    | Sporadic | Australia | 31 |
| AUS2721    | M | 54 | ALS     | Spinal    | Sporadic | Australia | 31 |
| AUS0253    | M | 55 | ALS     | Spinal    | Sporadic | Australia | 31 |
| AUS2748    | M | 57 | ALS     | Spinal    | Sporadic | Australia | 31 |
| AUS2101    | M | 67 | ALS     | Bulbar    | Sporadic | Australia | 31 |
| M430       | F | 42 | ALS     | Bulbar    | Sporadic | Finland   | 31 |
| M461       | F | 42 | ALS     | NA        | Familial | Finland   | 31 |
| M375       | F | 43 | ALS     | NA        | Familial | Finland   | 31 |
| M69        | F | 43 | ALS     | Spinal    | Sporadic | Finland   | 31 |
| M463       | F | 44 | ALS     | NA        | Sporadic | Finland   | 31 |
| M427       | F | 47 | ALS     | Spinal    | Familial | Finland   | 31 |
| M36        | F | 47 | ALS     | Spinal    | Sporadic | Finland   | 31 |
| M355       | F | 48 | ALS     | Bulbar    | Familial | Finland   | 31 |
| M45        | F | 48 | ALS     | Spinal    | Sporadic | Finland   | 31 |
| M40        | F | 49 | ALS     | Bulbar    | Sporadic | Finland   | 31 |
| M234       | F | 49 | ALS     | NA        | Sporadic | Finland   | 31 |
| M113       | F | 50 | ALS     | Bulbar    | Familial | Finland   | 31 |
| M228       | F | 51 | ALS     | Bulbar    | Sporadic | Finland   | 31 |

|      |   |    |     |        |          |         |    |
|------|---|----|-----|--------|----------|---------|----|
| M472 | F | 52 | ALS | Bulbar | Familial | Finland | 31 |
| M88  | F | 52 | ALS | Spinal | Familial | Finland | 31 |
| M71  | F | 53 | ALS | Spinal | Familial | Finland | 31 |
| M217 | F | 53 | ALS | Spinal | Familial | Finland | 31 |
| M11  | F | 53 | ALS | Spinal | Sporadic | Finland | 31 |
| M46  | F | 53 | ALS | Spinal | Sporadic | Finland | 31 |
| M147 | F | 55 | ALS | Bulbar | Familial | Finland | 31 |
| M344 | F | 55 | ALS | Bulbar | Familial | Finland | 31 |
| M341 | F | 55 | ALS | NA     | Familial | Finland | 31 |
| M51  | F | 55 | ALS | Spinal | Familial | Finland | 31 |
| M242 | F | 55 | ALS | Spinal | Familial | Finland | 31 |
| M218 | F | 55 | ALS | Spinal | Sporadic | Finland | 31 |
| M350 | F | 56 | ALS | Spinal | Sporadic | Finland | 31 |
| M326 | F | 57 | ALS | Spinal | Familial | Finland | 31 |
| M399 | F | 57 | ALS | Spinal | Familial | Finland | 31 |
| M114 | F | 57 | ALS | Spinal | Sporadic | Finland | 31 |
| M396 | F | 57 | ALS | Spinal | Sporadic | Finland | 31 |
| M23  | F | 58 | ALS | Bulbar | Sporadic | Finland | 31 |
| M102 | F | 58 | ALS | Bulbar | Sporadic | Finland | 31 |
| M16  | F | 58 | ALS | Spinal | Familial | Finland | 31 |
| M248 | F | 58 | ALS | Spinal | Sporadic | Finland | 31 |
| M415 | F | 59 | ALS | Spinal | Sporadic | Finland | 31 |
| M101 | F | 60 | ALS | Bulbar | Familial | Finland | 31 |
| M269 | F | 60 | ALS | Spinal | Sporadic | Finland | 31 |
| M167 | F | 61 | ALS | Bulbar | Familial | Finland | 31 |
| M343 | F | 61 | ALS | Bulbar | Sporadic | Finland | 31 |
| M469 | F | 61 | ALS | NA     | Familial | Finland | 31 |
| M245 | F | 62 | ALS | Bulbar | Sporadic | Finland | 31 |
| M354 | F | 62 | ALS | NA     | Familial | Finland | 31 |
| M60  | F | 63 | ALS | Spinal | Sporadic | Finland | 31 |
| M150 | F | 64 | ALS | Spinal | Sporadic | Finland | 31 |
| M137 | F | 65 | ALS | Bulbar | Familial | Finland | 31 |
| M369 | F | 65 | ALS | Bulbar | Sporadic | Finland | 31 |
| M158 | F | 65 | ALS | Spinal | Sporadic | Finland | 31 |
| M257 | F | 65 | ALS | Spinal | Sporadic | Finland | 31 |
| M73  | F | 66 | ALS | Spinal | Familial | Finland | 31 |
| M170 | F | 67 | ALS | Bulbar | Sporadic | Finland | 31 |
| M72  | F | 67 | ALS | Spinal | Sporadic | Finland | 31 |
| M262 | F | 68 | ALS | Bulbar | Familial | Finland | 31 |
| M392 | F | 68 | ALS | Spinal | Familial | Finland | 31 |
| M24  | F | 71 | ALS | Bulbar | Sporadic | Finland | 31 |
| M272 | M | 35 | ALS | Spinal | Sporadic | Finland | 31 |
| M202 | M | 37 | ALS | Bulbar | Sporadic | Finland | 31 |
| M230 | M | 37 | ALS | Spinal | Sporadic | Finland | 31 |
| M387 | M | 38 | ALS | NA     | Sporadic | Finland | 31 |
| M370 | M | 39 | ALS | NA     | Sporadic | Finland | 31 |
| M169 | M | 41 | ALS | Spinal | Sporadic | Finland | 31 |

|        |   |    |     |           |          |         |    |
|--------|---|----|-----|-----------|----------|---------|----|
| M312   | M | 43 | ALS | Spinal    | Familial | Finland | 31 |
| M121   | M | 44 | ALS | Spinal    | Familial | Finland | 31 |
| M332   | M | 46 | ALS | Spinal    | Familial | Finland | 31 |
| M327   | M | 46 | ALS | Spinal    | Sporadic | Finland | 31 |
| M56    | M | 47 | ALS | Bulbar    | Familial | Finland | 31 |
| M83    | M | 47 | ALS | Spinal    | Sporadic | Finland | 31 |
| M324   | M | 47 | ALS | Spinal    | Sporadic | Finland | 31 |
| M42    | M | 48 | ALS | Bulbar    | Familial | Finland | 31 |
| M237   | M | 48 | ALS | Spinal    | Familial | Finland | 31 |
| M75    | M | 50 | ALS | Spinal    | Familial | Finland | 31 |
| M115   | M | 52 | ALS | Bulbar    | Sporadic | Finland | 31 |
| M220   | M | 52 | ALS | Bulbar    | Sporadic | Finland | 31 |
| M303   | M | 52 | ALS | Spinal    | Sporadic | Finland | 31 |
| M316   | M | 54 | ALS | Spinal    | Familial | Finland | 31 |
| M50    | M | 55 | ALS | Spinal    | Familial | Finland | 31 |
| M58    | M | 55 | ALS | Spinal    | Sporadic | Finland | 31 |
| M39    | M | 56 | ALS | Bulbar    | Familial | Finland | 31 |
| M493   | M | 56 | ALS | Bulbar    | Sporadic | Finland | 31 |
| M141   | M | 56 | ALS | Spinal    | Familial | Finland | 31 |
| M349   | M | 56 | ALS | Spinal    | Familial | Finland | 31 |
| M340   | M | 57 | ALS | Bulbar    | Sporadic | Finland | 31 |
| M458   | M | 57 | ALS | Bulbar    | Sporadic | Finland | 31 |
| M172   | M | 57 | ALS | Spinal    | Familial | Finland | 31 |
| M335   | M | 58 | ALS | Spinal    | Familial | Finland | 31 |
| M93    | M | 59 | ALS | Bulbar    | Familial | Finland | 31 |
| M14    | M | 59 | ALS | Bulbar    | Sporadic | Finland | 31 |
| M66    | M | 59 | ALS | Spinal    | Familial | Finland | 31 |
| M63    | M | 59 | ALS | Spinal    | Sporadic | Finland | 31 |
| M96    | M | 59 | ALS | Spinal    | Sporadic | Finland | 31 |
| M222   | M | 59 | ALS | Spinal    | Sporadic | Finland | 31 |
| M301   | M | 61 | ALS | Spinal    | Sporadic | Finland | 31 |
| M52    | M | 62 | ALS | Spinal    | Familial | Finland | 31 |
| M97    | M | 62 | ALS | Spinal    | Familial | Finland | 31 |
| M373   | M | 63 | ALS | Spinal    | Sporadic | Finland | 31 |
| M84    | M | 64 | ALS | Bulbar    | Sporadic | Finland | 31 |
| M444   | M | 64 | ALS | Spinal    | Sporadic | Finland | 31 |
| M28    | M | 65 | ALS | Spinal    | Familial | Finland | 31 |
| M280   | M | 65 | ALS | Spinal    | Familial | Finland | 31 |
| M338   | M | 65 | ALS | Spinal    | Familial | Finland | 31 |
| M53    | M | 65 | ALS | Spinal    | Sporadic | Finland | 31 |
| M92    | M | 66 | ALS | Bulbar    | Sporadic | Finland | 31 |
| M94    | M | 66 | ALS | Spinal    | Sporadic | Finland | 31 |
| M13    | M | 69 | ALS | Bulbar    | Sporadic | Finland | 31 |
| M76    | M | 71 | ALS | Bulbar    | Familial | Finland | 31 |
| M250   | M | 77 | ALS | Spinal    | Familial | Finland | 31 |
| M306   | F | 47 | FTD | Cognitive | Familial | Finland | 31 |
| FTD330 | F | 51 | FTD | Cognitive | Sporadic | Finland | 31 |

|                 |   |    |         |           |          |         |    |
|-----------------|---|----|---------|-----------|----------|---------|----|
| M51             | F | 54 | FTD     | Cognitive | Familial | Finland | 31 |
| FTD212          | F | 58 | FTD     | Cognitive | Sporadic | Finland | 31 |
| M352            | F | 59 | FTD     | Cognitive | Familial | Finland | 31 |
| FTD047          | F | 59 | FTD     | Cognitive | Sporadic | Finland | 31 |
| M240            | F | 60 | FTD     | Cognitive | Familial | Finland | 31 |
| FTD200          | F | 60 | FTD     | Cognitive | Sporadic | Finland | 31 |
| FTD014          | F | 60 | FTD     | Cognitive | Sporadic | Finland | 31 |
| M109            | F | 63 | FTD     | Cognitive | Familial | Finland | 31 |
| M225            | F | 64 | FTD     | Cognitive | Familial | Finland | 31 |
| FTD328          | F | 66 | FTD     | Cognitive | Sporadic | Finland | 31 |
| M348            | M | 46 | FTD     | Cognitive | Familial | Finland | 31 |
| FTD063          | M | 51 | FTD     | Cognitive | Sporadic | Finland | 31 |
| M257            | M | 54 | FTD     | Cognitive | Familial | Finland | 31 |
| M337            | M | 54 | FTD     | Cognitive | Familial | Finland | 31 |
| M336            | M | 55 | FTD     | Cognitive | Familial | Finland | 31 |
| M222            | M | 57 | FTD     | Cognitive | Familial | Finland | 31 |
| FTD191          | M | 57 | FTD     | Cognitive | Sporadic | Finland | 31 |
| M353            | M | 64 | FTD     | Cognitive | Familial | Finland | 31 |
| FTD091          | M | 64 | FTD     | Cognitive | Sporadic | Finland | 31 |
| M66             | M | 70 | FTD     | Cognitive | Familial | Finland | 31 |
| VAN537          | F | 91 | Control | NA        | NA       | Finland | 31 |
| VAN301          | M | 86 | Control | NA        | NA       | Finland | 31 |
| DFT-NIM-SAN-133 | F | 48 | FTD     | Cognitive | Familial | France  | 31 |
| DFT-TEN-CAR-233 | F | 57 | FTD     | NA        | Familial | France  | 31 |
| DFT-CLE-RAV-536 | F | 60 | FTD     | Cognitive | Familial | France  | 31 |
| DFT-SAL-BRE-257 | F | 60 | FTD     | NA        | Sporadic | France  | 31 |
| DFT-NAN-CAR-092 | F | 61 | FTD     | NA        | Sporadic | France  | 31 |
| DFT-SAL-GRA-250 | F | 62 | FTD     | Cognitive | Sporadic | France  | 31 |
| DFT-LIM-VER-706 | F | 64 | FTD     | NA        | Sporadic | France  | 31 |
| DFT-NAN-BRO-102 | F | 67 | FTD     | NA        | Familial | France  | 31 |
| DFT-SAL-JOL-172 | F | 68 | FTD     | Cognitive | Familial | France  | 31 |
| DFT-BRI-DEL-221 | F | 68 | FTD     | NA        | Familial | France  | 31 |
| DFT-TOU-BOU-209 | F | 68 | FTD     | NA        | Familial | France  | 31 |
| DFT-REN-LOR-030 | F | 69 | FTD     | NA        | Familial | France  | 31 |
| DFT-BRI-SAI-196 | F | 75 | FTD     | NA        | Familial | France  | 31 |
| DFT-GEN-RHO-198 | M | 30 | FTD     | NA        | Familial | France  | 31 |
| DFT-BOR-BAU-126 | M | 35 | FTD     | NA        | Familial | France  | 31 |
| DFT-SAL-GAR-014 | M | 42 | FTD     | Cognitive | Sporadic | France  | 31 |
| DFT-CAE-LEL-151 | M | 47 | FTD     | NA        | Familial | France  | 31 |
| DFT-SAI-LAC-029 | M | 50 | FTD     | Cognitive | Sporadic | France  | 31 |
| DFT-REN-TAR-006 | M | 50 | FTD     | NA        | Familial | France  | 31 |
| DFT-TEN-ROU-173 | M | 50 | FTD     | NA        | Familial | France  | 31 |
| DFT-NAN-ETI-455 | M | 51 | FTD     | NA        | Sporadic | France  | 31 |
| DFT-SAL-CHE-159 | M | 52 | FTD     | NA        | Sporadic | France  | 31 |
| DFT-SAL-PON-041 | M | 53 | FTD     | NA        | Sporadic | France  | 31 |
| DFT-DIJ-GAU-602 | M | 56 | FTD     | NA        | Sporadic | France  | 31 |
| DFT-NAN-CHE-135 | M | 57 | FTD     | NA        | Familial | France  | 31 |

|                 |   |    |     |           |          |         |    |
|-----------------|---|----|-----|-----------|----------|---------|----|
| DFT-NAN-VIN-197 | M | 58 | FTD | NA        | Familial | France  | 31 |
| DFT-REN-LAI-083 | M | 58 | FTD | NA        | Familial | France  | 31 |
| A-ALZ-LIG-091   | M | 59 | FTD | Cognitive | Familial | France  | 31 |
| DFT-REN-MEG-193 | M | 59 | FTD | Cognitive | Familial | France  | 31 |
| DFT-SAL-GIL-045 | M | 59 | FTD | Cognitive | Sporadic | France  | 31 |
| DFT-SAL-PEY-622 | M | 65 | FTD | Cognitive | Familial | France  | 31 |
| DFT-SAL-COU-094 | M | 65 | FTD | NA        | Familial | France  | 31 |
| FTD009          | M | 67 | FTD | Cognitive | Sporadic | France  | 31 |
| SAL-BOU-504     | M | 69 | FTD | Cognitive | Familial | France  | 31 |
| DFT-SAL-CAR-518 | M | 72 | FTD | NA        | Sporadic | France  | 31 |
| DFT-STR-THE-119 | M | 72 | FTD | NA        | Sporadic | France  | 31 |
| W513            | F | 43 | ALS | Spinal    | Sporadic | Germany | 31 |
| W316            | F | 52 | ALS | Spinal    | Sporadic | Germany | 31 |
| WUR006          | F | 54 | ALS | NA        | Familial | Germany | 31 |
| WUR378          | F | 54 | ALS | NA        | Familial | Germany | 31 |
| WUR820          | F | 54 | ALS | NA        | Familial | Germany | 31 |
| WUR237          | F | 55 | ALS | Bulbar    | Familial | Germany | 31 |
| W408            | F | 57 | ALS | Bulbar    | Sporadic | Germany | 31 |
| WUR496          | F | 58 | ALS | NA        | Familial | Germany | 31 |
| W201            | F | 58 | ALS | Spinal    | Sporadic | Germany | 31 |
| W424            | F | 58 | ALS | Spinal    | Sporadic | Germany | 31 |
| WUR048          | F | 58 | ALS | Spinal    | Familial | Germany | 31 |
| WUR107          | F | 59 | ALS | Bulbar    | Familial | Germany | 31 |
| W078            | F | 59 | ALS | Spinal    | Sporadic | Germany | 31 |
| WUR624          | F | 65 | ALS | NA        | Familial | Germany | 31 |
| W410            | F | 67 | ALS | Bulbar    | Sporadic | Germany | 31 |
| WUR636          | F | 67 | ALS | NA        | Familial | Germany | 31 |
| WUR409          | F | 68 | ALS | Bulbar    | Familial | Germany | 31 |
| WUR773          | F | 71 | ALS | NA        | Familial | Germany | 31 |
| W066            | F | 72 | ALS | Spinal    | Sporadic | Germany | 31 |
| W160            | F | 79 | ALS | Bulbar    | Sporadic | Germany | 31 |
| WUR521          | M | 35 | ALS | NA        | Familial | Germany | 31 |
| WUR162          | M | 37 | ALS | Bulbar    | Familial | Germany | 31 |
| WUR621          | M | 44 | ALS | NA        | Familial | Germany | 31 |
| W301            | M | 44 | ALS | Spinal    | Sporadic | Germany | 31 |
| W127            | M | 45 | ALS | Spinal    | Sporadic | Germany | 31 |
| WUR452          | M | 45 | ALS | Spinal    | Familial | Germany | 31 |
| W285            | M | 50 | ALS | Spinal    | Sporadic | Germany | 31 |
| W223            | M | 54 | ALS | Spinal    | Sporadic | Germany | 31 |
| W071            | M | 55 | ALS | Bulbar    | Sporadic | Germany | 31 |
| W460            | M | 55 | ALS | Bulbar    | Sporadic | Germany | 31 |
| W165            | M | 56 | ALS | Spinal    | Sporadic | Germany | 31 |
| W042            | M | 59 | ALS | Spinal    | Sporadic | Germany | 31 |
| W267            | M | 59 | ALS | Spinal    | Sporadic | Germany | 31 |
| W553            | M | 59 | ALS | Spinal    | Sporadic | Germany | 31 |
| W177            | M | 60 | ALS | Spinal    | Sporadic | Germany | 31 |
| W222            | M | 66 | ALS | Bulbar    | Sporadic | Germany | 31 |

|              |   |    |         |           |          |         |    |
|--------------|---|----|---------|-----------|----------|---------|----|
| W180         | M | 70 | ALS     | Bulbar    | Sporadic | Germany | 31 |
| KT348        | F | 26 | Control | NA        | NA       | Germany | 31 |
| KT041        | F | 35 | Control | NA        | NA       | Germany | 31 |
| PS25         | F | 61 | FTD     | Cognitive | Familial | Germany | 31 |
| PS2026       | F | 64 | FTD     | Cognitive | Familial | Germany | 31 |
| PS2009       | M | 55 | FTD     | Cognitive | Familial | Germany | 31 |
| PS31         | M | 61 | FTD     | Cognitive | Familial | Germany | 31 |
| NC1          | M | 45 | ALS     | Spinal    | Familial | Ireland | 31 |
| ISR4021      | F | 64 | ALS     | Spinal    | Familial | Israel  | 31 |
| ISR0026      | M | 56 | ALS     | Spinal    | Familial | Israel  | 31 |
| ISR2138      | M | 63 | ALS     | Spinal    | Familial | Israel  | 31 |
| SLA2011-247  | F | 36 | ALS     | Spinal    | Familial | Italy   | 31 |
| SLA2008-0394 | F | 44 | ALS     | Spinal    | Sporadic | Italy   | 31 |
| SLA2010-312  | F | 44 | ALS     | Spinal    | Familial | Italy   | 31 |
| SLA2010-468  | F | 45 | ALS     | Bulbar    | Familial | Italy   | 31 |
| IT_00523     | F | 46 | ALS     | Spinal    | Sporadic | Italy   | 31 |
| IT_15344     | F | 46 | ALS     | Spinal    | Sporadic | Italy   | 31 |
| SLA2009-224  | F | 50 | ALS     | Spinal    | Familial | Italy   | 31 |
| M151         | F | 51 | ALS     | Bulbar    | Familial | Italy   | 31 |
| M10743-FG    | F | 51 | ALS     | Spinal    | Familial | Italy   | 31 |
| IT_02229     | F | 52 | ALS     | Spinal    | Sporadic | Italy   | 31 |
| IT_09798     | F | 52 | ALS     | Spinal    | Sporadic | Italy   | 31 |
| SLA2010-527  | F | 55 | ALS     | Spinal    | Familial | Italy   | 31 |
| SLA2011-82   | F | 57 | ALS     | Spinal    | Familial | Italy   | 31 |
| SLA2010-043  | F | 59 | ALS     | Bulbar    | Familial | Italy   | 31 |
| SLA2010-135  | F | 59 | ALS     | Bulbar    | Familial | Italy   | 31 |
| SLA2010-320  | F | 59 | ALS     | Spinal    | Familial | Italy   | 31 |
| M153         | F | 61 | ALS     | Bulbar    | Familial | Italy   | 31 |
| IT_01267     | F | 63 | ALS     | Spinal    | Sporadic | Italy   | 31 |
| SLA2008-266  | F | 63 | ALS     | Bulbar    | Familial | Italy   | 31 |
| SLA2011-78   | F | 63 | ALS     | Bulbar    | Familial | Italy   | 31 |
| FALSRO3      | F | 64 | ALS     | Spinal    | Familial | Italy   | 31 |
| SLA2008-0106 | F | 65 | ALS     | Spinal    | Familial | Italy   | 31 |
| PO2007-1876  | F | 67 | ALS     | Bulbar    | Sporadic | Italy   | 31 |
| PO2007-2029  | F | 67 | ALS     | Bulbar    | Sporadic | Italy   | 31 |
| IT_20115     | F | 68 | ALS     | Bulbar    | Sporadic | Italy   | 31 |
| SLA2011-297  | F | 72 | ALS     | Spinal    | Familial | Italy   | 31 |
| PO2007-1352  | M | 35 | ALS     | Spinal    | Familial | Italy   | 31 |
| IT_10736     | M | 40 | ALS     | Spinal    | Sporadic | Italy   | 31 |
| M1594        | M | 44 | ALS     | Spinal    | Familial | Italy   | 31 |
| SLA2008-0386 | M | 45 | ALS     | Spinal    | Familial | Italy   | 31 |
| SLA2011-89   | M | 48 | ALS     | Spinal    | Familial | Italy   | 31 |
| SLA2009-0092 | M | 48 | ALS     | Spinal    | Sporadic | Italy   | 31 |
| SLA2009-45   | M | 50 | ALS     | Bulbar    | Familial | Italy   | 31 |
| SLA2011-55   | M | 50 | ALS     | Bulbar    | Familial | Italy   | 31 |
| IT_15358     | M | 52 | ALS     | Bulbar    | Sporadic | Italy   | 31 |
| PO2007-1872  | M | 52 | ALS     | Spinal    | Sporadic | Italy   | 31 |

|              |   |    |     |        |          |             |    |
|--------------|---|----|-----|--------|----------|-------------|----|
| PO2007-0976  | M | 53 | ALS | Bulbar | Sporadic | Italy       | 31 |
| SLA2009-0307 | M | 54 | ALS | Spinal | Familial | Italy       | 31 |
| SLA2011-294  | M | 54 | ALS | Spinal | Familial | Italy       | 31 |
| SLA2011-292  | M | 57 | ALS | Spinal | Familial | Italy       | 31 |
| SLA2011-273  | M | 59 | ALS | Bulbar | Familial | Italy       | 31 |
| SLA2010-0200 | M | 60 | ALS | Spinal | Familial | Italy       | 31 |
| SLA2009-300  | M | 62 | ALS | Bulbar | Familial | Italy       | 31 |
| PO2007-291   | M | 62 | ALS | Spinal | Familial | Italy       | 31 |
| IT_20118     | M | 63 | ALS | Spinal | Sporadic | Italy       | 31 |
| 13807-BT     | M | 63 | ALS | Spinal | Familial | Italy       | 31 |
| SLA2009-0301 | M | 65 | ALS | Spinal | Familial | Italy       | 31 |
| SLA2009-0086 | M | 66 | ALS | Spinal | Sporadic | Italy       | 31 |
| IT_02612     | M | 66 | ALS | Spinal | Sporadic | Italy       | 31 |
| SLA2009-106  | M | 66 | ALS | Bulbar | Familial | Italy       | 31 |
| IT_02404     | M | 68 | ALS | Bulbar | Sporadic | Italy       | 31 |
| SLA2011-289  | M | 69 | ALS | Bulbar | Familial | Italy       | 31 |
| IT_10744     | M | 70 | ALS | Spinal | Sporadic | Italy       | 31 |
| M210         | F | 49 | ALS | Spinal | Familial | Japan       | 31 |
| dutch2       | F | 40 | FTD | NA     | Familial | Netherlands | 31 |
| dutch3       | F | 40 | FTD | NA     | Familial | Netherlands | 31 |
| dutch6       | F | 42 | FTD | NA     | Familial | Netherlands | 31 |
| dutch9       | F | 45 | FTD | NA     | Familial | Netherlands | 31 |
| dutch17      | F | 51 | FTD | NA     | Familial | Netherlands | 31 |
| dutch20      | F | 51 | FTD | NA     | Familial | Netherlands | 31 |
| dutch30      | F | 54 | FTD | NA     | Familial | Netherlands | 31 |
| dutch215     | F | 58 | FTD | NA     | Sporadic | Netherlands | 31 |
| dutch248     | F | 60 | FTD | NA     | Sporadic | Netherlands | 31 |
| dutch59      | F | 60 | FTD | NA     | Familial | Netherlands | 31 |
| dutch67      | F | 61 | FTD | NA     | Familial | Netherlands | 31 |
| dutch77      | F | 63 | FTD | NA     | Familial | Netherlands | 31 |
| dutch279     | F | 63 | FTD | NA     | Sporadic | Netherlands | 31 |
| dutch84      | F | 63 | FTD | NA     | Familial | Netherlands | 31 |
| dutch86      | F | 64 | FTD | NA     | Familial | Netherlands | 31 |
| dutch93      | F | 65 | FTD | NA     | Familial | Netherlands | 31 |
| dutch100     | F | 66 | FTD | NA     | Familial | Netherlands | 31 |
| dutch329     | F | 70 | FTD | NA     | Sporadic | Netherlands | 31 |
| dutch4       | M | 40 | FTD | NA     | Familial | Netherlands | 31 |
| dutch13      | M | 49 | FTD | NA     | Familial | Netherlands | 31 |
| dutch24      | M | 52 | FTD | NA     | Familial | Netherlands | 31 |
| dutch35      | M | 55 | FTD | NA     | Familial | Netherlands | 31 |
| dutch36      | M | 55 | FTD | NA     | Familial | Netherlands | 31 |
| dutch193     | M | 56 | FTD | NA     | Sporadic | Netherlands | 31 |
| dutch38      | M | 56 | FTD | NA     | Familial | Netherlands | 31 |
| dutch44      | M | 57 | FTD | NA     | Familial | Netherlands | 31 |
| dutch49      | M | 58 | FTD | NA     | Familial | Netherlands | 31 |
| dutch57      | M | 60 | FTD | NA     | Familial | Netherlands | 31 |
| dutch61      | M | 60 | FTD | NA     | Familial | Netherlands | 31 |



|             |   |    |     |           |          |             |    |
|-------------|---|----|-----|-----------|----------|-------------|----|
| dutch62     | M | 60 | FTD | NA        | Familial | Netherlands | 31 |
| dutch66     | M | 61 | FTD | NA        | Familial | Netherlands | 31 |
| dutch68     | M | 61 | FTD | NA        | Familial | Netherlands | 31 |
| dutch76     | M | 63 | FTD | NA        | Familial | Netherlands | 31 |
| dutch102    | M | 67 | FTD | NA        | Familial | Netherlands | 31 |
| dutch116    | M | 76 | FTD | NA        | Familial | Netherlands | 31 |
| SLA2011-207 | F | 34 | ALS | Spinal    | Sporadic | Sardinia    | 31 |
| 15344-FV    | F | 46 | ALS | Spinal    | Familial | Sardinia    | 31 |
| SLA2010-066 | F | 55 | ALS | Spinal    | Familial | Sardinia    | 31 |
| SLA2011-228 | F | 57 | ALS | Bulbar    | Familial | Sardinia    | 31 |
| SLA2010-506 | F | 57 | ALS | Spinal    | Sporadic | Sardinia    | 31 |
| SLA2011-165 | F | 60 | ALS | Spinal    | Familial | Sardinia    | 31 |
| SR1         | F | 61 | ALS | Bulbar    | Sporadic | Sardinia    | 31 |
| SA1         | F | 67 | ALS | Bulbar    | Sporadic | Sardinia    | 31 |
| SLA2009-231 | M | 35 | ALS | Bulbar    | Sporadic | Sardinia    | 31 |
| SLA2011-240 | M | 50 | ALS | Spinal    | Familial | Sardinia    | 31 |
| SLA2010-517 | M | 54 | ALS | Spinal    | Sporadic | Sardinia    | 31 |
| SLA2009-211 | M | 56 | ALS | Spinal    | Familial | Sardinia    | 31 |
| SLA2011-226 | M | 58 | ALS | Spinal    | Sporadic | Sardinia    | 31 |
| SLA2009-205 | M | 60 | ALS | Spinal    | Sporadic | Sardinia    | 31 |
| SLA2009-204 | M | 62 | ALS | Bulbar    | Familial | Sardinia    | 31 |
| SLA2010-524 | M | 62 | ALS | Spinal    | Sporadic | Sardinia    | 31 |
| SLA2009-191 | M | 63 | ALS | Spinal    | Sporadic | Sardinia    | 31 |
| SLA2009-195 | M | 66 | ALS | Bulbar    | Familial | Sardinia    | 31 |
| SLA2009-125 | M | 68 | ALS | Spinal    | Familial | Sardinia    | 31 |
| SLA2009-190 | M | 69 | ALS | Spinal    | Familial | Sardinia    | 31 |
| SLA2009-162 | M | 78 | ALS | Bulbar    | Familial | Sardinia    | 31 |
| FTD2011-2   | M | 60 | FTD | Cognitive | Familial | Sardinia    | 31 |
| M3962-3963  | F | 68 | FTD | Cognitive | Familial | Sweden      | 31 |
| M9518       | F | 45 | FTD | Cognitive | Familial | Taiwan      | 31 |
| M9428       | F | 54 | FTD | Cognitive | Familial | Taiwan      | 31 |
| BM018       | F | 50 | ALS | Bulbar    | Familial | UK          | 31 |
| BM009       | F | 52 | ALS | Spinal    | Sporadic | UK          | 31 |
| BM032       | F | 69 | ALS | Spinal    | Sporadic | UK          | 31 |
| BM043       | F | 71 | ALS | Bulbar    | Sporadic | UK          | 31 |
| BM156       | M | 40 | ALS | Spinal    | Sporadic | UK          | 31 |
| BM065       | M | 51 | ALS | Bulbar    | Sporadic | UK          | 31 |
| BM014       | M | 51 | ALS | Bulbar    | Familial | UK          | 31 |
| BM139       | M | 58 | ALS | Spinal    | Sporadic | UK          | 31 |
| BM074       | M | 58 | ALS | Spinal    | Familial | UK          | 31 |
| BM110       | M | 62 | ALS | Spinal    | Familial | UK          | 31 |
| BM151       | M | 63 | ALS | Spinal    | Familial | UK          | 31 |
| M4017       | F | 45 | ALS | Spinal    | Familial | UK          | 31 |
| M10456      | F | 53 | ALS | Spinal    | Familial | UK          | 31 |
| M11159      | F | 53 | ALS | Spinal    | Sporadic | UK          | 31 |
| M9001       | F | 60 | ALS | Spinal    | Familial | UK          | 31 |
| M11135      | F | 64 | ALS | Spinal    | Familial | UK          | 31 |

|           |   |    |     |           |          |    |    |
|-----------|---|----|-----|-----------|----------|----|----|
| M11171    | F | 68 | ALS | Bulbar    | Sporadic | UK | 31 |
| M11125    | M | 37 | ALS | Spinal    | Sporadic | UK | 31 |
| M11184    | M | 46 | ALS | Spinal    | Sporadic | UK | 31 |
| M11083    | M | 59 | ALS | Spinal    | Familial | UK | 31 |
| M10325    | F | 44 | FTD | Cognitive | Familial | UK | 31 |
| M4024     | F | 51 | FTD | Cognitive | Familial | UK | 31 |
| M8326     | M | 51 | FTD | Cognitive | Familial | UK | 31 |
| M10322    | M | 73 | FTD | Cognitive | Sporadic | UK | 31 |
| M423      | F | 47 | FTD | NA        | Familial | UK | 31 |
| M290      | F | 52 | FTD | NA        | Familial | UK | 31 |
| M441      | F | 53 | FTD | Cognitive | Sporadic | UK | 31 |
| M31198996 | F | 54 | FTD | NA        | Familial | UK | 31 |
| M416      | F | 55 | FTD | NA        | Familial | UK | 31 |
| M343      | F | 60 | FTD | NA        | Familial | UK | 31 |
| M344      | F | 60 | FTD | NA        | Familial | UK | 31 |
| M553      | F | 61 | FTD | Cognitive | Sporadic | UK | 31 |
| M31200871 | F | 62 | FTD | Cognitive | Sporadic | UK | 31 |
| M231      | F | 67 | FTD | Cognitive | Sporadic | UK | 31 |
| M31200941 | F | 68 | FTD | Cognitive | Sporadic | UK | 31 |
| M31200082 | M | 39 | FTD | NA        | Sporadic | UK | 31 |
| M31200979 | M | 45 | FTD | Cognitive | Sporadic | UK | 31 |
| M539      | M | 49 | FTD | NA        | Familial | UK | 31 |
| M336      | M | 56 | FTD | Cognitive | Sporadic | UK | 31 |
| M31199512 | M | 56 | FTD | Cognitive | Sporadic | UK | 31 |
| M397      | M | 57 | FTD | NA        | Familial | UK | 31 |
| M375      | M | 58 | FTD | Cognitive | Sporadic | UK | 31 |
| M546      | M | 58 | FTD | Cognitive | Sporadic | UK | 31 |
| M31200646 | M | 58 | FTD | Cognitive | Sporadic | UK | 31 |
| M251      | M | 60 | FTD | Cognitive | Sporadic | UK | 31 |
| M31200287 | M | 62 | FTD | Cognitive | Sporadic | UK | 31 |
| M31200050 | M | 63 | FTD | Cognitive | Sporadic | UK | 31 |
| M119      | M | 63 | FTD | NA        | Familial | UK | 31 |
| M31200523 | M | 65 | FTD | Cognitive | Sporadic | UK | 31 |
| M155      | M | 68 | FTD | Cognitive | Sporadic | UK | 31 |
| M74       | M | 70 | FTD | Cognitive | Sporadic | UK | 31 |
| M4726     | F | 46 | FTD | Cognitive | Familial | UK | 31 |
| M12440    | F | 50 | FTD | Cognitive | Familial | UK | 31 |
| M12533    | F | 53 | FTD | Cognitive | Familial | UK | 31 |
| M12417    | F | 54 | FTD | Cognitive | Sporadic | UK | 31 |
| M20784    | F | 56 | FTD | Cognitive | Familial | UK | 31 |
| M25551    | F | 56 | FTD | Cognitive | Familial | UK | 31 |
| M6569     | F | 63 | FTD | Cognitive | Familial | UK | 31 |
| M19240    | F | 68 | FTD | Cognitive | Familial | UK | 31 |
| M22415    | M | 39 | FTD | Cognitive | Familial | UK | 31 |
| M16036    | M | 48 | FTD | Cognitive | Sporadic | UK | 31 |
| M12368    | M | 51 | FTD | Cognitive | Familial | UK | 31 |
| M12458    | M | 54 | FTD | Cognitive | Familial | UK | 31 |

|            |   |    |     |           |          |    |    |
|------------|---|----|-----|-----------|----------|----|----|
| M1831-A138 | M | 55 | FTD | Cognitive | Familial | UK | 31 |
| M12475     | M | 55 | FTD | Cognitive | Sporadic | UK | 31 |
| M25478     | M | 58 | FTD | Cognitive | Familial | UK | 31 |
| M17323     | M | 59 | FTD | Cognitive | Familial | UK | 31 |
| M20737     | M | 59 | FTD | Cognitive | Sporadic | UK | 31 |
| M19245     | M | 62 | FTD | Cognitive | Sporadic | UK | 31 |
| M5765      | F | 50 | ALS | Spinal    | Sporadic | UK | 31 |
| M6282      | F | 56 | ALS | Bulbar    | Familial | UK | 31 |
| M5795      | F | 57 | ALS | Bulbar    | Familial | UK | 31 |
| M5664      | F | 58 | ALS | Spinal    | Familial | UK | 31 |
| M5803      | F | 58 | ALS | Spinal    | Sporadic | UK | 31 |
| M5656      | F | 59 | ALS | Spinal    | Sporadic | UK | 31 |
| M5777      | F | 77 | ALS | Spinal    | Familial | UK | 31 |
| M5769      | M | 34 | ALS | Spinal    | Sporadic | UK | 31 |
| M6258      | M | 55 | ALS | Bulbar    | Familial | UK | 31 |
| NP208-08_C | M | 55 | ALS | NA        | Familial | UK | 31 |
| M6219      | M | 57 | ALS | Spinal    | Sporadic | UK | 31 |
| M6222      | M | 58 | ALS | Cognitive | Sporadic | UK | 31 |
| M399       | F | 69 | FTD | Cognitive | Sporadic | UK | 31 |
| M319       | M | 48 | FTD | Cognitive | Familial | UK | 31 |
| LDP0474    | F | 27 | ALS | Bulbar    | Familial | UK | 31 |
| LDP0257    | F | 36 | ALS | Bulbar    | Familial | UK | 31 |
| LDP0456    | F | 45 | ALS | Bulbar    | Familial | UK | 31 |
| LDP0035    | F | 48 | ALS | Spinal    | Familial | UK | 31 |
| LDP0092    | F | 48 | ALS | Spinal    | Familial | UK | 31 |
| M133       | F | 49 | ALS | Spinal    | Sporadic | UK | 31 |
| LDP0442    | F | 50 | ALS | Bulbar    | Familial | UK | 31 |
| M2         | F | 52 | ALS | Spinal    | Sporadic | UK | 31 |
| M143       | F | 56 | ALS | Spinal    | Familial | UK | 31 |
| LDP0793    | F | 57 | ALS | Bulbar    | Sporadic | UK | 31 |
| M115       | F | 57 | ALS | Spinal    | Sporadic | UK | 31 |
| M14        | F | 58 | ALS | Spinal    | Sporadic | UK | 31 |
| M51        | F | 59 | ALS | Spinal    | Familial | UK | 31 |
| M37        | F | 59 | ALS | Spinal    | Sporadic | UK | 31 |
| LDP0340    | F | 61 | ALS | Bulbar    | Familial | UK | 31 |
| M70        | F | 61 | ALS | Bulbar    | Sporadic | UK | 31 |
| M171       | F | 61 | ALS | Spinal    | Familial | UK | 31 |
| LDP0163    | F | 61 | ALS | Spinal    | Familial | UK | 31 |
| M104       | F | 61 | ALS | Spinal    | Sporadic | UK | 31 |
| M136       | F | 62 | ALS | Bulbar    | Familial | UK | 31 |
| LDP0216    | F | 62 | ALS | Spinal    | Sporadic | UK | 31 |
| LDP0632    | F | 63 | ALS | Bulbar    | Sporadic | UK | 31 |
| M164       | F | 63 | ALS | Cognitive | Familial | UK | 31 |
| LDP0909    | F | 63 | ALS | Spinal    | Familial | UK | 31 |
| LDP0039    | F | 65 | ALS | Bulbar    | Sporadic | UK | 31 |
| M25        | F | 66 | ALS | Bulbar    | Sporadic | UK | 31 |
| M13        | F | 66 | ALS | Spinal    | Sporadic | UK | 31 |

|                 |   |    |     |        |          |    |    |
|-----------------|---|----|-----|--------|----------|----|----|
| LDP0284         | F | 66 | ALS | Spinal | Sporadic | UK | 31 |
| LDP0221         | F | 67 | ALS | Spinal | Sporadic | UK | 31 |
| M168            | F | 71 | ALS | Spinal | Sporadic | UK | 31 |
| LDP0208         | F | 71 | ALS | Spinal | Sporadic | UK | 31 |
| LDP0183         | M | 30 | ALS | Bulbar | Sporadic | UK | 31 |
| M92             | M | 42 | ALS | Spinal | Familial | UK | 31 |
| M12             | M | 43 | ALS | Spinal | Sporadic | UK | 31 |
| M128            | M | 45 | ALS | Spinal | Sporadic | UK | 31 |
| M155            | M | 47 | ALS | Spinal | Familial | UK | 31 |
| LDP1156         | M | 48 | ALS | Bulbar | Familial | UK | 31 |
| LDP0312         | M | 50 | ALS | Spinal | Familial | UK | 31 |
| LDP0285         | M | 51 | ALS | Bulbar | Sporadic | UK | 31 |
| LDP0870         | M | 55 | ALS | Spinal | Sporadic | UK | 31 |
| LDP0639         | M | 56 | ALS | Bulbar | Sporadic | UK | 31 |
| M158            | M | 56 | ALS | Spinal | Sporadic | UK | 31 |
| LDP0317         | M | 59 | ALS | Spinal | Sporadic | UK | 31 |
| LDP0399         | M | 60 | ALS | Bulbar | Sporadic | UK | 31 |
| LDP0955         | M | 60 | ALS | Bulbar | Sporadic | UK | 31 |
| M114            | M | 60 | ALS | Spinal | Sporadic | UK | 31 |
| M118            | M | 60 | ALS | Spinal | Sporadic | UK | 31 |
| M110            | M | 62 | ALS | Bulbar | Sporadic | UK | 31 |
| M17             | M | 62 | ALS | Spinal | Familial | UK | 31 |
| M48             | M | 63 | ALS | Spinal | Sporadic | UK | 31 |
| M65             | M | 63 | ALS | Spinal | Sporadic | UK | 31 |
| LDP0837         | M | 64 | ALS | Bulbar | Sporadic | UK | 31 |
| M101            | M | 64 | ALS | Spinal | Familial | UK | 31 |
| M23             | M | 64 | ALS | Spinal | Sporadic | UK | 31 |
| M120            | M | 64 | ALS | Spinal | Sporadic | UK | 31 |
| M167            | M | 67 | ALS | Spinal | Familial | UK | 31 |
| M170            | M | 69 | ALS | Spinal | Familial | UK | 31 |
| M165            | M | 76 | ALS | Spinal | Sporadic | UK | 31 |
| AR240           | F | 55 | ALS | Bulbar | Familial | UK | 31 |
| Richard_ALS_152 | F | 56 | ALS | Spinal | Sporadic | UK | 31 |
| Richard_ALS_100 | F | 68 | ALS | Spinal | Sporadic | UK | 31 |
| AR252           | M | 48 | ALS | Spinal | Sporadic | UK | 31 |
| AR149           | M | 58 | ALS | Spinal | Familial | UK | 31 |
| Richard_ALS_106 | M | 66 | ALS | Spinal | Sporadic | UK | 31 |
| M1042           | F | 68 | ALS | Bulbar | Sporadic | US | 31 |
| M1614           | F | 68 | ALS | Bulbar | Sporadic | US | 31 |
| M1271           | F | 58 | ALS | Bulbar | Sporadic | US | 31 |
| M1500           | F | 69 | ALS | Bulbar | Sporadic | US | 31 |
| M1667           | F | 71 | ALS | Spinal | Sporadic | US | 31 |
| M1461           | M | 49 | ALS | Spinal | Sporadic | US | 31 |
| M1641           | M | 58 | ALS | Bulbar | Sporadic | US | 31 |
| M2106           | M | 61 | ALS | Bulbar | Sporadic | US | 31 |
| ND09438         | F | 43 | ALS | Spinal | Sporadic | US | 31 |
| ND11933         | F | 44 | ALS | Bulbar | Familial | US | 31 |

|           |   |    |     |        |          |    |    |
|-----------|---|----|-----|--------|----------|----|----|
| ND12526   | F | 45 | ALS | Spinal | Sporadic | US | 31 |
| ERG7311   | F | 46 | ALS | Bulbar | Familial | US | 31 |
| ND12277   | F | 46 | ALS | Bulbar | Familial | US | 31 |
| ND12909   | F | 49 | ALS | Bulbar | Familial | US | 31 |
| ND10689   | F | 49 | ALS | Spinal | Familial | US | 31 |
| ND12105   | F | 49 | ALS | Spinal | Sporadic | US | 31 |
| B004      | F | 50 | ALS | Bulbar | Sporadic | US | 31 |
| ND10000   | F | 50 | ALS | Spinal | Sporadic | US | 31 |
| ND10828   | F | 51 | ALS | Spinal | Sporadic | US | 31 |
| ND10579   | F | 52 | ALS | Bulbar | Sporadic | US | 31 |
| 2209-0009 | F | 54 | ALS | Spinal | Familial | US | 31 |
| ND09362   | F | 54 | ALS | Spinal | Sporadic | US | 31 |
| B035      | F | 55 | ALS | Bulbar | Sporadic | US | 31 |
| 2013-0100 | F | 55 | ALS | Spinal | Familial | US | 31 |
| ND11374   | F | 55 | ALS | Spinal | Familial | US | 31 |
| ND09576   | F | 55 | ALS | Spinal | Sporadic | US | 31 |
| ND12421   | F | 55 | ALS | Spinal | Sporadic | US | 31 |
| ERG9106   | F | 56 | ALS | Bulbar | Familial | US | 31 |
| ND13803   | F | 57 | ALS | Bulbar | Familial | US | 31 |
| 2209-0023 | F | 57 | ALS | Spinal | Sporadic | US | 31 |
| B079      | F | 58 | ALS | NA     | Sporadic | US | 31 |
| ND10905   | F | 58 | ALS | Spinal | Familial | US | 31 |
| ND12199   | F | 59 | ALS | Spinal | Sporadic | US | 31 |
| ND12089   | F | 60 | ALS | Bulbar | Familial | US | 31 |
| ND13615   | F | 60 | ALS | Bulbar | Sporadic | US | 31 |
| ND09204   | F | 60 | ALS | Spinal | Familial | US | 31 |
| ND08544   | F | 61 | ALS | Bulbar | Familial | US | 31 |
| ND11081   | F | 61 | ALS | Bulbar | Familial | US | 31 |
| ND15686   | F | 62 | ALS | Spinal | Familial | US | 31 |
| B063      | F | 63 | ALS | NA     | Sporadic | US | 31 |
| ND12334   | F | 63 | ALS | Spinal | Sporadic | US | 31 |
| ND14911   | F | 64 | ALS | Spinal | Familial | US | 31 |
| ND20142   | F | 65 | ALS | Spinal | Familial | US | 31 |
| ND09996   | F | 66 | ALS | Spinal | Sporadic | US | 31 |
| ND11917   | F | 67 | ALS | Bulbar | Familial | US | 31 |
| ND11680   | F | 68 | ALS | Bulbar | Familial | US | 31 |
| ND12754   | F | 68 | ALS | Bulbar | Familial | US | 31 |
| ND08980   | F | 70 | ALS | Spinal | Sporadic | US | 31 |
| ND14339   | F | 71 | ALS | Bulbar | Familial | US | 31 |
| ND14596   | F | 72 | ALS | Spinal | Familial | US | 31 |
| ERG7045   | M | 37 | ALS | Spinal | Familial | US | 31 |
| ND15362   | M | 37 | ALS | Spinal | Familial | US | 31 |
| 2013-0089 | M | 44 | ALS | Bulbar | Familial | US | 31 |
| B029      | M | 44 | ALS | Spinal | Familial | US | 31 |
| ND11343   | M | 44 | ALS | Spinal | Sporadic | US | 31 |
| ND12904   | M | 45 | ALS | Spinal | Familial | US | 31 |
| ND08957   | M | 46 | ALS | Spinal | Familial | US | 31 |

|           |   |    |         |        |          |    |    |
|-----------|---|----|---------|--------|----------|----|----|
| ND11252   | M | 47 | ALS     | Spinal | Familial | US | 31 |
| ND12099   | M | 48 | ALS     | Spinal | Familial | US | 31 |
| B055      | M | 48 | ALS     | Spinal | Sporadic | US | 31 |
| ND10284   | M | 49 | ALS     | Spinal | Familial | US | 31 |
| ND06751   | M | 50 | ALS     | Spinal | Familial | US | 31 |
| ND09492   | M | 51 | ALS     | Spinal | Familial | US | 31 |
| ND12402   | M | 52 | ALS     | Spinal | Familial | US | 31 |
| ND12161   | M | 52 | ALS     | Spinal | Sporadic | US | 31 |
| ND11411   | M | 53 | ALS     | Bulbar | Familial | US | 31 |
| ND12100   | M | 55 | ALS     | Bulbar | Familial | US | 31 |
| ERG8863   | M | 55 | ALS     | Spinal | Familial | US | 31 |
| ND10123   | M | 55 | ALS     | Spinal | Sporadic | US | 31 |
| ND09373   | M | 56 | ALS     | NA     | Familial | US | 31 |
| ND11494   | M | 56 | ALS     | Spinal | Familial | US | 31 |
| ND14442   | M | 56 | ALS     | Spinal | Familial | US | 31 |
| ND11583   | M | 57 | ALS     | Bulbar | Familial | US | 31 |
| ND09508   | M | 57 | ALS     | Spinal | Familial | US | 31 |
| 2122-0004 | M | 57 | ALS     | Spinal | Sporadic | US | 31 |
| ERG9090   | M | 58 | ALS     | Spinal | Familial | US | 31 |
| ND13682   | M | 58 | ALS     | Spinal | Familial | US | 31 |
| ND13828   | M | 58 | ALS     | Spinal | Familial | US | 31 |
| ND11869   | M | 58 | ALS     | Spinal | Sporadic | US | 31 |
| ND14954   | M | 59 | ALS     | Bulbar | Familial | US | 31 |
| ND10101   | M | 60 | ALS     | Spinal | Familial | US | 31 |
| ND10023   | M | 60 | ALS     | Spinal | Sporadic | US | 31 |
| B048      | M | 61 | ALS     | NA     | Sporadic | US | 31 |
| 2209-0007 | M | 61 | ALS     | Spinal | Familial | US | 31 |
| B062      | M | 62 | ALS     | NA     | Sporadic | US | 31 |
| ND10973   | M | 63 | ALS     | Spinal | Sporadic | US | 31 |
| B042      | M | 64 | ALS     | Spinal | Familial | US | 31 |
| ND10966   | M | 64 | ALS     | Spinal | Familial | US | 31 |
| ND14186   | M | 64 | ALS     | Spinal | Familial | US | 31 |
| 2013-0011 | M | 65 | ALS     | Spinal | Familial | US | 31 |
| ND11749   | M | 65 | ALS     | Spinal | Familial | US | 31 |
| B016      | M | 66 | ALS     | Bulbar | Sporadic | US | 31 |
| ND07489   | M | 66 | ALS     | Spinal | Familial | US | 31 |
| ND11548   | M | 67 | ALS     | Spinal | Familial | US | 31 |
| ND15814   | M | 68 | ALS     | Spinal | Familial | US | 31 |
| 2013-0094 | M | 71 | ALS     | Spinal | Familial | US | 31 |
| B075      | M | 73 | ALS     | NA     | Sporadic | US | 31 |
| B057      | M | 74 | ALS     | NA     | Sporadic | US | 31 |
| ND09377   | M | 77 | ALS     | Spinal | Sporadic | US | 31 |
| B061      | M | 80 | ALS     | NA     | Sporadic | US | 31 |
| ND12455   | M | 80 | ALS     | Spinal | Familial | US | 31 |
| ND15567   | F | 36 | Control | NA     | NA       | US | 31 |
| M105957   | F | 41 | ALS     | Spinal | Sporadic | US | 31 |
| M110368   | F | 41 | ALS     | Spinal | Sporadic | US | 31 |

|              |   |    |         |           |          |        |    |
|--------------|---|----|---------|-----------|----------|--------|----|
| M101448      | F | 46 | ALS     | Bulbar    | Sporadic | US     | 31 |
| M114747      | F | 52 | ALS     | Spinal    | Sporadic | US     | 31 |
| M110243      | F | 65 | ALS     | Spinal    | Sporadic | US     | 31 |
| M107297      | F | 67 | ALS     | Spinal    | Sporadic | US     | 31 |
| M105812      | M | 40 | ALS     | NA        | Sporadic | US     | 31 |
| M106599      | M | 43 | ALS     | Spinal    | Sporadic | US     | 31 |
| M113381      | M | 49 | ALS     | Spinal    | Sporadic | US     | 31 |
| M114327      | M | 51 | ALS     | Bulbar    | Sporadic | US     | 31 |
| M105547      | M | 55 | ALS     | Bulbar    | Sporadic | US     | 31 |
| M100089      | M | 60 | ALS     | Spinal    | Sporadic | US     | 31 |
| M100737      | M | 66 | ALS     | Bulbar    | Sporadic | US     | 31 |
| M104236      | M | 71 | ALS     | Spinal    | Sporadic | US     | 31 |
| Mandic1      | F | 64 | FTD     | Cognitive | NA       | Serbia | 32 |
| Mandic2      | F | 50 | FTD     | Cognitive | NA       | Serbia | 32 |
| Mandic3      | F | 53 | FTD     | Cognitive | NA       | Serbia | 32 |
| Mandic4      | F | 41 | ALS-FTD | Bulbar    | NA       | Serbia | 32 |
| Millecamps1  | M | 68 | ALS     | Spinal    | Familial | France | 33 |
| Millecamps2  | M | 68 | ALS     | Bulbar    | Familial | France | 33 |
| Millecamps3  | M | 49 | ALS     | Spinal    | Familial | France | 33 |
| Millecamps4  | M | 45 | ALS     | Spinal    | Familial | France | 33 |
| Millecamps5  | M | 59 | ALS     | Bulbar    | Familial | France | 33 |
| Millecamps6  | M | 46 | ALS-FTD | Spinal    | Familial | France | 33 |
| Millecamps7  | M | 62 | ALS     | Bulbar    | Familial | France | 33 |
| Millecamps8  | M | 70 | ALS-FTD | Bulbar    | Familial | France | 33 |
| Millecamps9  | F | 58 | ALS     | Bulbar    | Familial | France | 33 |
| Millecamps10 | M | 49 | ALS-FTD | Spinal    | Familial | France | 33 |
| Millecamps11 | M | 47 | ALS-FTD | Bulbar    | Familial | France | 33 |
| Millecamps12 | M | 61 | ALS     | Bulbar    | Familial | France | 33 |
| Millecamps13 | M | 52 | ALS     | Spinal    | Familial | France | 33 |
| Millecamps14 | M | 71 | ALS     | Spinal    | Familial | France | 33 |
| Millecamps15 | F | 44 | ALS     | Spinal    | Familial | France | 33 |
| Millecamps16 | F | 64 | ALS     | Spinal    | Familial | France | 33 |
| Millecamps17 | M | 53 | ALS     | Bulbar    | Familial | France | 33 |
| Millecamps18 | F | 71 | ALS-FTD | Bulbar    | Familial | France | 33 |
| Millecamps19 | F | 70 | ALS-FTD | Spinal    | Familial | France | 33 |
| Millecamps20 | F | 63 | ALS     | Spinal    | Familial | France | 33 |
| Millecamps21 | M | 62 | ALS     | Spinal    | Familial | France | 33 |
| Millecamps22 | M | 50 | ALS     | Spinal    | Familial | France | 33 |
| Millecamps23 | M | 44 | ALS     | Spinal    | Familial | France | 33 |
| Millecamps24 | M | 75 | ALS-FTD | Bulbar    | Familial | France | 33 |
| Millecamps25 | M | 48 | ALS     | Bulbar    | Familial | France | 33 |
| Millecamps26 | M | 67 | ALS-FTD | NA        | Familial | France | 33 |
| Millecamps27 | F | 60 | ALS     | Spinal    | Familial | France | 33 |
| Millecamps28 | F | 70 | ALS     | Spinal    | Familial | France | 33 |
| Millecamps29 | F | 52 | ALS     | Bulbar    | Familial | France | 33 |
| Millecamps30 | F | 58 | ALS-FTD | Spinal    | Familial | France | 33 |
| Millecamps31 | M | 69 | ALS     | Spinal    | Familial | France | 33 |

|              |   |    |         |         |          |        |    |
|--------------|---|----|---------|---------|----------|--------|----|
| Millecamps32 | M | 63 | ALS     | Bulbar  | Familial | France | 33 |
| Millecamps33 | M | 61 | ALS     | Spinal  | Familial | France | 33 |
| Millecamps34 | M | 56 | ALS     | Bulbar  | Familial | France | 33 |
| Millecamps35 | M | 64 | ALS     | Bulbar  | Familial | France | 33 |
| Millecamps36 | F | 52 | ALS     | Bulbar  | Familial | France | 33 |
| Millecamps37 | F | 88 | Control | NA      | NA       | France | 33 |
| Mok1         | M | 65 | ALS     | NA      | Sporadic | Greece | 34 |
| Mok2         | M | 57 | ALS     | NA      | Sporadic | Greece | 34 |
| Mok3         | M | 58 | ALS     | NA      | Sporadic | Greece | 34 |
| Mok4         | F | 73 | ALS     | NA      | Familial | Greece | 34 |
| Mok5         | M | 56 | ALS     | NA      | Sporadic | Greece | 34 |
| Mok6         | F | 61 | ALS     | NA      | Familial | Greece | 34 |
| Mok7         | M | 25 | ALS     | NA      | Sporadic | Greece | 34 |
| Mok8         | F | 70 | ALS     | NA      | Sporadic | Greece | 34 |
| Mok9         | M | 45 | ALS     | NA      | Sporadic | Greece | 34 |
| Mok10        | M | 48 | ALS     | NA      | Sporadic | Greece | 34 |
| Mok11        | M | 55 | ALS     | NA      | Sporadic | Greece | 34 |
| Mok12        | M | 54 | ALS     | NA      | Sporadic | Greece | 34 |
| Mok13        | M | 70 | ALS     | NA      | Sporadic | Greece | 34 |
| Mok14        | F | 46 | ALS     | NA      | Familial | Greece | 34 |
| Mok15        | M | 55 | ALS     | NA      | Familial | Greece | 34 |
| Mok16        | M | 43 | ALS     | NA      | Familial | Greece | 34 |
| Murray1      | F | 48 | ALS     | Spinal  | NA       | US     | 35 |
| Murray2      | F | 47 | ALS     | Bulbar  | NA       | US     | 35 |
| Murray3      | M | 52 | ALS     | Spinal  | NA       | US     | 35 |
| Murray4      | F | 61 | ALS     | Bulbar  | NA       | US     | 35 |
| Murray5      | F | 76 | ALS     | NA      | NA       | US     | 35 |
| Murray6      | M | 56 | ALS     | General | NA       | US     | 35 |
| Murray7      | M | 56 | ALS-FTD | General | NA       | US     | 35 |
| Murray8      | M | 52 | ALS     | General | NA       | US     | 35 |
| Murray9      | F | 50 | FTD     | NA      | NA       | US     | 35 |
| Murray10     | F | 57 | FTD     | NA      | NA       | US     | 35 |
| Murray11     | M | 57 | FTD     | NA      | NA       | US     | 35 |
| Murray12     | F | 54 | FTD     | NA      | NA       | US     | 35 |
| Murray13     | F | 70 | FTD     | NA      | NA       | US     | 35 |
| Murray14     | M | 66 | FTD     | NA      | NA       | US     | 35 |
| Murray15     | M | 70 | FTD     | NA      | NA       | US     | 35 |
| Murray16     | M | 69 | FTD     | NA      | NA       | US     | 35 |
| Murray17     | M | 63 | FTD     | NA      | NA       | US     | 35 |
| Murray18     | M | 74 | FTD     | NA      | NA       | US     | 35 |
| Murray19     | F | 79 | FTD     | NA      | NA       | US     | 35 |
| Murray20     | M | 78 | FTD     | NA      | NA       | US     | 35 |
| Ogaki1       | M | 65 | ALS-FTD | Spinal  | Familial | Japan  | 36 |
| Ogaki2       | M | 57 | ALS     | Bulbar  | Familial | Japan  | 36 |
| Ogaki3       | M | 72 | ALS     | Spinal  | Sporadic | Japan  | 36 |
| Ozoguz1      | M | 32 | ALS     | Spinal  | Familial | Turkey | 37 |
| Ozoguz2      | F | 46 | ALS     | NA      | Familial | Turkey | 37 |



|             |   |    |         |         |          |           |    |
|-------------|---|----|---------|---------|----------|-----------|----|
| Ozoguz3     | M | 46 | ALS     | Bulbar  | Familial | Turkey    | 37 |
| Ozoguz4     | M | 56 | ALS     | Spinal  | Familial | Turkey    | 37 |
| Ozoguz5     | M | 80 | ALS     | Spinal  | Familial | Turkey    | 37 |
| Ozoguz6     | M | 63 | ALS     | Spinal  | Familial | Turkey    | 37 |
| Ozoguz7     | F | 37 | ALS     | Spinal  | Familial | Turkey    | 37 |
| Ozoguz8     | F | 62 | ALS     | Spinal  | Familial | Turkey    | 37 |
| Ozoguz9     | F | 58 | ALS     | Spinal  | Familial | Turkey    | 37 |
| Ozoguz10    | F | 57 | ALS     | NA      | Familial | Turkey    | 37 |
| Ozoguz11    | M | 58 | ALS     | Spinal  | Familial | Turkey    | 37 |
| Ozoguz12    | M | 46 | ALS     | Bulbar  | Familial | Turkey    | 37 |
| Ozoguz13    | F | 53 | ALS     | Bulbar  | Familial | Turkey    | 37 |
| Ozoguz14    | F | 63 | ALS     | Bulbar  | Familial | Turkey    | 37 |
| Ozoguz15    | M | 71 | ALS     | Spinal  | Familial | Turkey    | 37 |
| Ozoguz16    | M | 54 | ALS     | Spinal  | Familial | Turkey    | 37 |
| Ozoguz17    | F | 63 | ALS     | Spinal  | Familial | Turkey    | 37 |
| Ozoguz18    | M | 62 | ALS     | Spinal  | Familial | Turkey    | 37 |
| Ozoguz19    | F | 69 | ALS     | Spinal  | Sporadic | Turkey    | 37 |
| Ozoguz20    | M | 48 | ALS     | NA      | Sporadic | Turkey    | 37 |
| Ozoguz21    | M | 49 | ALS     | NA      | Sporadic | Turkey    | 37 |
| Ozoguz22    | F | 48 | ALS     | General | Sporadic | Turkey    | 37 |
| Ozoguz23    | F | 55 | ALS     | Spinal  | Sporadic | Turkey    | 37 |
| Ozoguz24    | M | 42 | ALS     | Spinal  | Sporadic | Turkey    | 37 |
| Ozoguz25    | F | 52 | ALS     | Spinal  | Sporadic | Turkey    | 37 |
| Ozoguz26    | M | 53 | ALS     | Spinal  | Sporadic | Turkey    | 37 |
| Ozoguz27    | M | 56 | ALS     | General | Sporadic | Turkey    | 37 |
| Ozoguz28    | M | 69 | ALS     | Bulbar  | Sporadic | Turkey    | 37 |
| Ozoguz29    | M | 60 | ALS     | Spinal  | Sporadic | Turkey    | 37 |
| Pamphlett1  | M | 36 | ALS     | NA      | Sporadic | Australia | 38 |
| Pamphlett2  | M | 46 | ALS     | NA      | Sporadic | Australia | 38 |
| Sabatelli1  | M | 52 | ALS-FTD | Bulbar  | Sporadic | Italy     | 39 |
| Sabatelli2  | M | 65 | ALS     | Spinal  | Sporadic | Italy     | 39 |
| Sabatelli3  | M | 68 | ALS     | Bulbar  | Sporadic | Italy     | 39 |
| Sabatelli4  | M | 62 | ALS-FTD | Spinal  | Sporadic | Italy     | 39 |
| Sabatelli5  | M | 53 | ALS-FTD | Bulbar  | Sporadic | Italy     | 39 |
| Sabatelli6  | M | 70 | ALS     | Spinal  | Sporadic | Italy     | 39 |
| Sabatelli7  | F | 51 | ALS     | Spinal  | Sporadic | Italy     | 39 |
| Sabatelli8  | M | 65 | ALS     | Spinal  | Sporadic | Italy     | 39 |
| Sabatelli9  | M | 48 | ALS     | Spinal  | Sporadic | Italy     | 39 |
| Sabatelli10 | F | 52 | ALS-FTD | Spinal  | Sporadic | Italy     | 39 |
| Sabatelli11 | F | 66 | ALS     | Bulbar  | Sporadic | Italy     | 39 |
| Sabatelli12 | M | 52 | ALS-FTD | Spinal  | Sporadic | Italy     | 39 |
| Sabatelli13 | F | 43 | ALS-FTD | Spinal  | Sporadic | Italy     | 39 |
| Sabatelli14 | M | 40 | ALS     | Spinal  | Sporadic | Italy     | 39 |
| Sabatelli15 | F | 41 | ALS     | Bulbar  | Sporadic | Italy     | 39 |
| Sabatelli16 | F | 72 | ALS-FTD | Spinal  | Sporadic | Italy     | 39 |
| Sabatelli17 | F | 60 | ALS-FTD | Bulbar  | Sporadic | Italy     | 39 |
| Sabatelli18 | F | 62 | ALS     | Spinal  | Sporadic | Italy     | 39 |

|             |   |    |         |        |          |       |    |
|-------------|---|----|---------|--------|----------|-------|----|
| Sabatelli19 | M | 69 | ALS-FTD | Bulbar | Sporadic | Italy | 39 |
| Sabatelli20 | F | 78 | ALS-FTD | Bulbar | Sporadic | Italy | 39 |
| Sabatelli21 | M | 56 | ALS     | Spinal | Sporadic | Italy | 39 |
| Sabatelli22 | M | 83 | ALS-FTD | Bulbar | Sporadic | Italy | 39 |
| Sabatelli23 | F | 32 | ALS     | Spinal | Sporadic | Italy | 39 |
| Sabatelli24 | F | 34 | ALS-FTD | Spinal | Sporadic | Italy | 39 |
| Sabatelli25 | M | 58 | ALS-FTD | Spinal | Sporadic | Italy | 39 |
| Sabatelli26 | M | 54 | ALS     | Spinal | Sporadic | Italy | 39 |
| Sabatelli27 | F | 63 | ALS-FTD | Spinal | Sporadic | Italy | 39 |
| Sabatelli28 | M | 63 | ALS-FTD | Spinal | Sporadic | Italy | 39 |
| Sabatelli29 | M | 60 | ALS     | Spinal | Sporadic | Italy | 39 |
| Sabatelli30 | M | 62 | ALS-FTD | Spinal | Sporadic | Italy | 39 |
| Sabatelli31 | F | 67 | ALS-FTD | Bulbar | Sporadic | Italy | 39 |
| Sabatelli32 | F | 67 | ALS-FTD | Bulbar | Sporadic | Italy | 39 |
| Sabatelli33 | F | 68 | ALS     | Bulbar | Sporadic | Italy | 39 |
| Sabatelli34 | M | 75 | ALS     | Bulbar | Sporadic | Italy | 39 |
| Sabatelli35 | F | 59 | ALS     | Spinal | Sporadic | Italy | 39 |
| Sabatelli36 | M | 60 | ALS     | Spinal | Sporadic | Italy | 39 |
| Sabatelli37 | F | 65 | ALS     | Bulbar | Sporadic | Italy | 39 |
| Sabatelli38 | M | 61 | ALS     | Spinal | Sporadic | Italy | 39 |
| Sabatelli39 | F | 38 | ALS     | Spinal | Sporadic | Italy | 39 |
| Sabatelli40 | F | 42 | ALS     | Spinal | Sporadic | Italy | 39 |
| Sabatelli41 | M | 44 | ALS     | Spinal | Sporadic | Italy | 39 |
| Sabatelli42 | M | 68 | ALS     | Spinal | Sporadic | Italy | 39 |
| Sabatelli43 | M | 64 | ALS-FTD | Spinal | Sporadic | Italy | 39 |
| Sabatelli44 | F | 43 | ALS     | Spinal | Sporadic | Italy | 39 |
| Sabatelli45 | F | 49 | ALS     | Bulbar | Sporadic | Italy | 39 |
| Sabatelli46 | F | 50 | ALS     | Spinal | Sporadic | Italy | 39 |
| Sabatelli47 | F | 58 | ALS     | Spinal | Sporadic | Italy | 39 |
| Sabatelli48 | F | 44 | ALS     | Spinal | Sporadic | Italy | 39 |
| Sabatelli49 | M | 59 | ALS     | Bulbar | Sporadic | Italy | 39 |
| Sabatelli50 | M | 48 | ALS     | Spinal | Sporadic | Italy | 39 |
| Sabatelli51 | M | 51 | ALS     | Spinal | Sporadic | Italy | 39 |
| Sabatelli52 | M | 62 | ALS     | Spinal | Sporadic | Italy | 39 |
| Sabatelli53 | F | 43 | ALS     | Bulbar | Sporadic | Italy | 39 |
| Sabatelli54 | M | 36 | ALS     | Spinal | Sporadic | Italy | 39 |
| Sabatelli55 | F | 66 | ALS-FTD | Spinal | Sporadic | Italy | 39 |
| Sabatelli56 | M | 58 | ALS-FTD | Spinal | Sporadic | Italy | 39 |
| Sabatelli57 | F | 59 | ALS-FTD | Bulbar | Sporadic | Italy | 39 |
| Sabatelli58 | F | 57 | ALS     | Bulbar | Sporadic | Italy | 39 |
| Sabatelli59 | F | 67 | ALS     | Spinal | Sporadic | Italy | 39 |
| Sabatelli60 | F | 59 | ALS     | Spinal | Sporadic | Italy | 39 |
| Sabatelli61 | M | 50 | ALS     | Spinal | Sporadic | Italy | 39 |
| Sabatelli62 | F | 71 | ALS-FTD | Bulbar | Sporadic | Italy | 39 |
| Sabatelli63 | F | 67 | ALS     | Bulbar | Sporadic | Italy | 39 |
| Sabatelli64 | M | 43 | ALS     | Spinal | Sporadic | Italy | 39 |
| Sabatelli65 | M | 56 | ALS     | Spinal | Sporadic | Italy | 39 |

|             |   |    |         |         |          |          |    |
|-------------|---|----|---------|---------|----------|----------|----|
| Sabatelli66 | M | 69 | ALS     | Bulbar  | Sporadic | Italy    | 39 |
| Sabatelli67 | F | 62 | ALS     | Spinal  | Sporadic | Italy    | 39 |
| Sabatelli68 | F | 56 | ALS     | Spinal  | Sporadic | Italy    | 39 |
| Sabatelli69 | M | 49 | ALS-FTD | Bulbar  | Sporadic | Italy    | 39 |
| Snowden1    | F | 54 | ALS-FTD | Bulbar  | Sporadic | UK       | 40 |
| Snowden2    | F | 54 | ALS-FTD | Bulbar  | Familial | UK       | 40 |
| Snowden3    | F | 72 | ALS-FTD | Bulbar  | Sporadic | UK       | 40 |
| Snowden4    | M | 58 | ALS-FTD | Bulbar  | NA       | UK       | 40 |
| Snowden5    | M | 57 | ALS-FTD | Spinal  | Sporadic | UK       | 40 |
| Snowden6    | F | 68 | ALS-FTD | Bulbar  | Familial | UK       | 40 |
| Snowden7    | F | 70 | ALS-FTD | General | Familial | UK       | 40 |
| Snowden8    | M | 58 | ALS-FTD | General | Sporadic | UK       | 40 |
| Snowden9    | M | 57 | ALS-FTD | General | Familial | UK       | 40 |
| Snowden10   | M | 49 | FTD     | NA      | Familial | UK       | 40 |
| Snowden11   | M | 55 | FTD     | NA      | Familial | UK       | 40 |
| Snowden12   | M | 64 | FTD     | NA      | Familial | UK       | 40 |
| Snowden13   | M | 65 | FTD     | NA      | Familial | UK       | 40 |
| Snowden14   | F | 53 | FTD     | NA      | Sporadic | UK       | 40 |
| Snowden15   | M | 58 | FTD     | NA      | Sporadic | UK       | 40 |
| Snowden16   | M | 62 | FTD     | NA      | Familial | UK       | 40 |
| Snowden17   | M | 68 | FTD     | NA      | Sporadic | UK       | 40 |
| Snowden18   | M | 39 | FTD     | NA      | Familial | UK       | 40 |
| Snowden19   | M | 70 | FTD     | NA      | Sporadic | UK       | 40 |
| Snowden20   | F | 52 | FTD     | NA      | Familial | UK       | 40 |
| Snowden21   | M | 55 | FTD     | NA      | Familial | UK       | 40 |
| Snowden22   | F | 62 | FTD     | NA      | Familial | UK       | 40 |
| Snowden23   | M | 46 | FTD     | NA      | Familial | UK       | 40 |
| Snowden24   | M | 59 | FTD     | NA      | Sporadic | UK       | 40 |
| Snowden25   | M | 55 | FTD     | NA      | Sporadic | UK       | 40 |
| Snowden26   | F | 72 | FTD     | NA      | Sporadic | UK       | 40 |
| Snowden27   | M | 56 | FTD     | NA      | Familial | UK       | 40 |
| Snowden28   | F | 60 | FTD     | NA      | Familial | UK       | 40 |
| Snowden29   | F | 47 | FTD     | NA      | Familial | UK       | 40 |
| Snowden30   | F | 52 | FTD     | NA      | Sporadic | UK       | 40 |
| Snowden31   | F | 62 | FTD     | NA      | Familial | UK       | 40 |
| Snowden32   | F | 58 | FTD     | NA      | Sporadic | UK       | 40 |
| Soong1      | F | 46 | ALS     | Spinal  | Familial | Taiwan   | 41 |
| Soong2      | F | 55 | ALS     | Bulbar  | Familial | Taiwan   | 41 |
| Soong3      | M | 46 | ALS     | Spinal  | Familial | Taiwan   | 41 |
| Soong4      | M | 49 | ALS     | Spinal  | Familial | Taiwan   | 41 |
| Soong5      | M | 48 | ALS     | Spinal  | Sporadic | Taiwan   | 41 |
| Soong6      | M | 42 | ALS     | Bulbar  | Sporadic | Taiwan   | 41 |
| Ticozzi1    | M | 62 | ALS     | Bulbar  | Familial | Italy    | 42 |
| Ticozzi2    | M | 49 | ALS     | Spinal  | Sporadic | Italy    | 42 |
| Vrabc1      | M | 52 | ALS     | Spinal  | Sporadic | Slovenia | 43 |
| Vrabc2      | F | 60 | ALS     | Spinal  | Sporadic | Slovenia | 43 |
| Vrabc3      | M | 61 | ALS-FTD | Spinal  | Sporadic | Slovenia | 43 |

|         |   |    |     |        |          |          |    |
|---------|---|----|-----|--------|----------|----------|----|
| Vrabec4 | F | 55 | ALS | Bulbar | Sporadic | Slovenia | 43 |
| Vrabec5 | M | 70 | ALS | Spinal | Sporadic | Slovenia | 43 |

ALS = amyotrophic lateral sclerosis, FTD = frontotemporal dementia, F = female, M = male, NA = not available, UK = United Kingdom, US = United States

## Supplemental References

- 1 Abramycheva, N. Y. *et al.* C9ORF72 hexanucleotide repeat expansion in ALS patients from the Central European Russia population. *Neurobiol. Aging* **36**, 2908 e2905-2909, doi:10.1016/j.neurobiolaging.2015.07.004 (2015).
- 2 Al-Sarraj, S. *et al.* p62 positive, TDP-43 negative, neuronal cytoplasmic and intranuclear inclusions in the cerebellum and hippocampus define the pathology of C9orf72-linked FTLN and MND/ALS. *Acta Neuropathol.* **122**, 691-702 (2011).
- 3 Alavi, A. *et al.* Repeat expansion in C9ORF72 is not a major cause of amyotrophic lateral sclerosis among Iranian patients. *Neurobiol. Aging* **35**, 267 e261-267, doi:10.1016/j.neurobiolaging.2013.07.016 (2014).
- 4 Beck, J. *et al.* Large C9orf72 hexanucleotide repeat expansions are seen in multiple neurodegenerative syndromes and are more frequent than expected in the UK population. *Am. J. Hum. Genet.* **92**, 345-353 (2013).
- 5 Benussi, L. *et al.* C9ORF72 hexanucleotide repeat number in frontotemporal lobar degeneration: a genotype-phenotype correlation study. *J. Alzheimers Dis.* **38**, 799-808 (2014).
- 6 Bouliotis, G. & Billingham, L. Crossing survival curves: alternatives to the log-rank test. *Trials* **12**, A137 (2011).
- 7 Cerami, C. *et al.* Novel evidence of phenotypical variability in the hexanucleotide repeat expansion in chromosome 9. *J. Alzheimers Dis.* **35**, 455-462 (2013).
- 8 Chester, C. *et al.* Rapidly progressive frontotemporal dementia and bulbar amyotrophic lateral sclerosis in Portuguese patients with C9orf72 mutation. *Amyotroph.Lat. Sci. Fr.* **14**, 70-72 (2013).
- 9 Chiò, A. *et al.* Clinical characteristics of patients with familial amyotrophic lateral sclerosis carrying the pathogenic GGGGCC hexanucleotide repeat expansion of C9ORF72. *Brain* **135**, 784-793 (2012).
- 10 Dobson-Stone, C. *et al.* C9ORF72 repeat expansion in clinical and neuropathologic frontotemporal dementia cohorts. *Neurology* **79**, 995-1001 (2012).
- 11 Dobson-Stone, C. *et al.* C9ORF72 repeat expansion in Australian and Spanish frontotemporal dementia patients. *PLoS One* **8**, e56899, doi:10.1371/journal.pone.0056899 (2013).
- 12 Dombroski, B. A. *et al.* C9orf72 hexanucleotide repeat expansion and Guam amyotrophic lateral sclerosis-Parkinsonism-dementia complex. *JAMA Neurol.* **70**, 742-745 (2013).
- 13 Ferrari, R. *et al.* Screening for C9ORF72 repeat expansion in FTLN. *Neurobiol. Aging* **33**, 1850.e1-11, doi: 10.1016/j.neurobiolaging.2012.02.017 (2012).
- 14 Fratta, P. *et al.* Screening a UK amyotrophic lateral sclerosis cohort provides evidence of multiple origins of the C9orf72 expansion. *Neurobiol. Aging* **36**, 546 e541-547, doi:10.1016/j.neurobiolaging.2014.07.037 (2015).

- 15 Galimberti, D. *et al.* Incomplete penetrance of the C9ORF72 hexanucleotide repeat expansions: frequency in a cohort of geriatric non-demented subjects. *J. Alzheimers Dis.* **39**, 19-22 (2014).
- 16 Galimberti, D. *et al.* Autosomal dominant frontotemporal lobar degeneration due to the C9ORF72 hexanucleotide repeat expansion: late-onset psychotic clinical presentation. *Biol. Psychiatry* **74**, 384-391 (2013).
- 17 Gijssels, I. *et al.* A C9orf72 promoter repeat expansion in a Flanders-Belgian cohort with disorders of the frontotemporal lobar degeneration-amyotrophic lateral sclerosis spectrum: a gene identification study. *Lancet Neurol.* **11**, 54-65 (2012).
- 18 Harms, M. *et al.* C9orf72 hexanucleotide repeat expansions in clinical Alzheimer disease. *JAMA Neurol.* **70**, 736-741 (2013).
- 19 Harms, M. B. *et al.* Lack of C9ORF72 coding mutations supports a gain of function for repeat expansions in amyotrophic lateral sclerosis. *Neurobiol. Aging* **34**, 2234.e2213-2239, doi:10.1016/j.neurobiolaging.2013.03.006 (2013).
- 20 Harms, M. B. *et al.* Parkinson disease is not associated with C9ORF72 repeat expansions. *Neurobiol. Aging* **34**, 1519.e1511-1512, doi:10.1016/j.neurobiolaging.2012.10.001 (2013).
- 21 He, J. *et al.* C9orf72 hexanucleotide repeat expansions in Chinese sporadic amyotrophic lateral sclerosis. *Neurobiol. Aging* **36**, 2660.e2661-2668, doi:10.1016/j.neurobiolaging.2015.06.002 (2015).
- 22 Ishiura, H. *et al.* C9ORF72 repeat expansion in amyotrophic lateral sclerosis in the Kii peninsula of Japan. *Arch. Neurol.* **69**, 1154-1158 (2012).
- 23 Jiao, B. *et al.* Identification of C9orf72 repeat expansions in patients with amyotrophic lateral sclerosis and frontotemporal dementia in mainland China. *Neurobiol. Aging* **35**, 936.e919-922, doi:10.1016/j.neurobiolaging.2013.10.001 (2014).
- 24 Kaivorinne, A. L. *et al.* Clinical Characteristics of C9ORF72-Linked Frontotemporal Lobar Degeneration. *Dement. Geriatr. Cogn. Dis. Extra* **3**, 251-262 (2013).
- 25 Kandiah, N. *et al.* Rapidly Progressive Dementia in a Chinese Patient due to C9ORF72 Mutation. *Can. J. Neurol. Sci.* **39**, 676-677 (2014).
- 26 Kenna, K. P. *et al.* Delineating the genetic heterogeneity of ALS using targeted high-throughput sequencing. *J. Med. Genet.* **50**, 776-783 (2013).
- 27 Konno, T. *et al.* Japanese amyotrophic lateral sclerosis patients with GGGGCC hexanucleotide repeat expansion in C9ORF72. *J. Neurol. Neurosurg. Psychiatry* **84**, 398-401 (2012).
- 28 Lindquist, S. G. *et al.* Corticobasal and ataxia syndromes widen the spectrum of C9ORF72 hexanucleotide expansion disease. *Clin. Genet.* **83**, 279-283 (2013).
- 29 Majounie, E. *et al.* Repeat expansion in C9ORF72 in Alzheimer's disease. *N. Engl. J. Med.* **366**, 283-284 (2012).
- 30 Mandic-Stojmenovic, G. *et al.* Screening for C9orf72 Expansion Mutation in Serbian Patients with Early-Onset Dementia. *Dement. Geriatr. Cogn. Dis.* **40** (2015).

- 31 Millecamps, S. *et al.* Phenotype difference between ALS patients with expanded repeats in C9ORF72 and patients with mutations in other ALS-related genes. *J. Med. Genet.* **49**, 258-263 (2012).
- 32 Mok, K. Y. *et al.* High frequency of the expanded C9ORF72 hexanucleotide repeat in familial and sporadic Greek ALS patients. *Neurobiol. Aging* **33**, 1851.e1851-1855, doi:10.1016/j.neurobiolaging.2012.02.021 (2012).
- 33 Murray, M. E. *et al.* Clinical and neuropathologic heterogeneity of c9FTD/ALS associated with hexanucleotide repeat expansion in C9ORF72. *Acta Neuropathol.* **122**, 673-690 (2011).
- 34 Ogaki, K. *et al.* Analysis of C9orf72 repeat expansion in 563 Japanese patients with amyotrophic lateral sclerosis. *Neurobiol. Aging* **33**, 2527.e2511-2526, doi:10.1016/j.neurobiolaging.2012.05.011 (2012).
- 35 Ozoguz, A. *et al.* The distinct genetic pattern of ALS in Turkey and novel mutations. *Neurobiol. Aging* **36**, 1764.e1769-1718, doi:10.1016/j.neurobiolaging.2014.12.032 (2015).
- 36 Pamphlett, R., Cheong, P. L., Trent, R. J. & Yu, B. Transmission of C9orf72 hexanucleotide repeat expansions in sporadic amyotrophic lateral sclerosis: an Australian trio study. *Neuroreport* **23**, 556-559 (2012).
- 37 Sabatelli, M. *et al.* C9ORF72 hexanucleotide repeat expansions in the Italian sporadic ALS population. *Neurobiol. Aging* **33**, 1848.e15-20, doi: 10.1016/j.neurobiolaging.2012.02.011 (2012).
- 38 Snowden, J. S. *et al.* Distinct clinical and pathological characteristics of frontotemporal dementia associated with C9ORF72 mutations. *Brain* **135**, 693-708 (2012).
- 39 Soong, B. W. *et al.* Extensive molecular genetic survey of Taiwanese patients with amyotrophic lateral sclerosis. *Neurobiol. Aging* **35**, 2423.e2421-2426, doi:10.1016/j.neurobiolaging.2014.05.008 (2014).
- 40 Ticozzi, N. *et al.* C9orf72 repeat expansions are restricted to the ALS-FTD spectrum. *Neurobiol. Aging* **35**, 936.e913-937, doi:10.1016/j.neurobiolaging.2013.09.037 (2014).
- 41 Vrabec, K. *et al.* Genetic analysis of amyotrophic lateral sclerosis in the Slovenian population. *Neurobiol. Aging* **36**, 1601.e1617-1620, doi:10.1016/j.neurobiolaging.2014.11.011 (2015).
